## **Development and Characterization of the Mode-of-Action of Inhibitory and Agonist Peptides Targeting the Voltage-Gated Sodium Channel SCN1B/ $\beta$ 1 Subunit**

Zachary J. Williams<sup>1</sup>, Anita Alvarez-Laviada<sup>2</sup>, Daniel Hoagland<sup>1</sup>, L. Jane Jourdan<sup>1</sup>, Steven Poelzing<sup>1,3,4</sup>,  
Julia Gorelik<sup>2</sup>, Robert G. Gourdie<sup>1,3,4</sup>†

<sup>1</sup>Fralin Biomedical Research Institute, Virginia Polytechnic University, Roanoke, VA, United States

<sup>2</sup>Department of Myocardial Function, Imperial College London, London, United Kingdom

<sup>3</sup>School of Medicine, Virginia Polytechnic University, Roanoke, VA, United States

<sup>4</sup>Department of Biomedical Engineering and Mechanics, Virginia Polytechnic University, Roanoke, VA, United States

Running title:  $\beta$ 1 Inhibitory and Agonist Peptides

†Correspondence should be addressed to: Robert G. Gourdie [gourdier@vtc.vt.edu](mailto:gourdier@vtc.vt.edu)

Fralin Biomedical Research Institute at Virginia Tech Carilion,

Center for Vascular and Heart Research,

2 Riverside Circle, Roanoke, VA, 24016, USA

Keywords: Arrhythmia, peptide therapeutic, Voltage-gated sodium channels, SCN1B ( $\beta$ 1/ $\beta$ 1B)

## ABSTRACT

Treatment of cardiac arrhythmias by targeting ion channels is challenging, with safe and effective therapies remaining an unmet clinical need. Modeling and experimental studies have shown that a voltage-gated sodium channel (VGSC)-rich nanodomain at edge of the gap junction (GJ) called the perinexus could provide new mechanistic insights into normal and abnormal conduction of action potentials in the heart. We have reported that a 19 amino acid SCN1B ( $\beta 1/\beta 1B$ ) mimetic peptide derived from the immunoglobulin domain of the VGSC subunit called  $\beta adp1$  acutely disrupts  $\beta 1$ -mediated adhesive interactions at cardiac perinexii, prompting arrhythmogenic changes during time courses of up to an hour. In the present study, we sought to gain further insight on  $\beta adp1$  mode-of-action, as well as identifying new SCN1B ( $\beta 1/\beta 1B$ ) mimetic peptides, with potential for inhibiting and/or promoting  $\beta 1$ -mediated adhesion. This included studies of the effect of  $\beta adp1$  and related peptides on SCN1B ( $\beta 1/\beta 1B$ ) Regulated Intramembrane Proteolysis (RIP) - a signaling pathway that has been shown to effect gene transcription, including that of VGSC subunits. Using patch clamp to assay cell-cell contact-associated VGSC activity in cardiomyocytes, and electric cell substrate impedance sensing (ECIS) to assess intercellular adhesion in cells heterologously expressing  $\beta 1$ , we find that inhibitory effects of  $\beta adp1$  can persist for up to 5 hours. However, this acute inhibition is not sustained, with  $\beta adp1$  effects on  $\beta 1$ -mediated adhesion lost after 24 hours. We also determined that a short peptide (LQLEED) near the carboxyl-terminal portion of  $\beta adp1$  inhibited adhesion in  $\beta 1$ -expressing cells in a manner similar to  $\beta adp1$ . Paradoxically, dimeric peptides incorporating a repeat of the LQLEED sequence promoted intercellular adhesion at all time points studied over a 2-day time course. Inhibitory and agonistic peptides were found to effect  $\beta 1$  RIP, with  $\beta adp1$  increasing RIP continuously over 48 hours, whilst dimeric agonists acutely increased RIP at 6 hours post-treatment, but not thereafter. In the presence of DAPT, an inhibitor of RIP, the effects of  $\beta adp1$  on ECIS-measured intercellular adhesion were lost, suggesting a relationship between RIP and inhibitory effects of the peptide. In sum, we identify novel SCN1B ( $\beta 1/\beta 1B$ ) mimetic peptides with potential to inhibit and promote intercellular  $\beta 1$ -mediated adhesion, possibly including by effects on  $\beta 1$  RIP, suggesting paths to development of anti-arrhythmic drugs targeting the perinexus.

## **INTRODUCTION**

The United States experiences between 180,000 and 450,000 sudden cardiac deaths annually, with cardiac arrhythmias playing a significant role [1-3]. Many drugs aimed at preventing arrhythmias target ion channels, including the sodium channel Nav1.5, but often have severe side effects [4]. For example, the Cardiac Arrhythmia Suppression Trial (CAST) was successful in reducing arrhythmogenic triggers, but unfortunately the therapies tested were also found to result in an increase in total deaths [5, 6]. This problematic clinical trial record, together with high costs, and the inherent deadly risks associated with targeting heart rhythm disorders, has slowed the development of anti-arrhythmic drugs. While there are new and growing methods of treating arrhythmias, such as catheter ablation [7, 8] neuroscientific therapies [9], or even optogenetic methods [10], there remains considerable academic and clinical interest in new mechanistic targets to address the growing unmet clinical need for safe and effective pharmacologic treatment of disorders of cardiac electrical rhythm [11, 12].

The voltage-gated sodium channel (VGSC) incorporates both alpha( $\alpha$ )- (e.g. Nav1.5) and beta ( $\beta$ )-subunits. VGSC  $\beta$  subunits are encoded by SCN1B-SCN4B ( $\beta$ 1- $\beta$ 4) and an alternatively spliced variant of SCN1B ( $\beta$ 1B) [13-20]. VGSC  $\beta$ -subunits have been reported to regulate channel excitability by altering channel gating, voltage-dependence of activation and inactivation, and inactivation speed. Additionally,  $\beta$  subunits have assignments in cell adhesion - mediated by an extracellular immunoglobulin (Ig) domain that shares homology with other adhesion molecules [13]. Consistent with adhesive function, SCN1B ( $\beta$ 1/ $\beta$ 1B) is prominently localized at zones of electro-mechanical contact between cardiomyocytes [21, 22], in particular at the perinexus, an intercalated disc nanodomain adjacent to the gap junction (GJ), co-locating with Nav1.5 [21, 22], other ion channels and scaffolding proteins [23-25].

A growing body of modeling and experimental data indicate that the perinexus has roles in normal and arrhythmogenic conduction of cardiac electrical excitation [21, 26-32]. The VGSC-rich perinexal domain at the GJ edge forms a 20-30 nm wide cleft of extracellular space. Adhesive interactions between Ig domains of SCN1B molecules on cells apposed at the GJ-adjacent cleft have been suggested to contribute to perinexal stability [21]. Two recent studies have provided further insights. First, modeling work by Ivanovic

and Kucera showed that the narrow intercellular spacing maintained at the perinexus, together with its adjacency to GJs, profoundly affected extracellular potential dynamics and local patterns of current flow, orchestrating propagation of action potentials via an ephaptic mechanism [26]. Second, Adams et al. demonstrated that the width of the perinexus, and its effect on the ephaptic mechanism, is a key determinant of normal cardiac conduction and not just a phenomenon of pathological states, as had been proposed by some [27]. Consistent with roles in health and disease, increases in cell-cell spacing at the perinexus has been linked to atrial arrhythmia in humans, suggesting that regulation of perinexal width and/or SCN1B ( $\beta 1/\beta 1B$ )-mediated adhesion may be targets for treating electrical disturbance to the heart [21, 33]. Further supporting this hypothesis, SCN1B KO mice show widened perinexii. Mutations in SCN1B in humans, including in the Ig domain, have been implicated in several arrhythmia-associated pathologies, including Brugada syndrome and Long QT syndrome [21, 34, 35].

In a previous report, we showed that a SCN1B ( $\beta 1/\beta 1B$ ) mimetic peptide derived from its immunoglobulin (Ig) domain called  $\beta adp1$  acutely disrupted  $\beta 1$ -mediated function. Over time courses of an hour or less,  $\beta adp1$  reduced adhesion in cells expressing SCN1B ( $\beta 1$ ), caused de-adhesion and expansion of perinexii in isolated guinea pig hearts and prompted arrhythmogenic changes in cardiomyocytes and hearts, including loss of sodium channel activity and conduction slowing [21]. In the present study, we investigated short- and long-term effects of  $\beta adp1$  and related peptides – including novel  $\beta 1$ -targeting inhibitory and agonist peptides. We find that the acute effects of  $\beta 1$ -targeting peptides, including loss of junctional sodium currents in cardiomyocytes and reductions in adhesion between  $\beta 1$ -expressing cells, are maintained for up to 5 hours. It was further determined that over longer periods the response of cells to the peptide altered, with treatment being associated with increased adhesion. Moreover, we show that this increase correlates with up-regulation of Regulated Intramembrane Proteolysis (RIP) of  $\beta 1$ .  $\beta 1$  was shown to be modified through RIP almost two decades ago [36]. Recent studies have solidified the importance of  $\beta 1$  RIP by showing that the intracellular domain of  $\beta 1$  translocates to the nucleus and alters transcription of various genes involved in the propagation of electrical activity in the heart, including VGSC complex proteins [37, 38]. The results

described herein suggest novel pro-drugs and paths to pharmacologically addressing the VGSC complex, with relevance to potential targeting of the perinexus and its assignments in cardiac conduction.

## **RESULTS**

### **$\beta$ adp1 Reduces Junctional Sodium Channel Activity, $\beta$ 1 Levels and Adhesion Over an Acute Time-**

**Course:** We have previously shown that a 30 minute treatment with  $\beta$ adp1, a 19 amino acid peptide mimetic of the SCN1B/  $\beta$ 1/ $\beta$ 1B immunoglobulin (Ig) domain, reduces peak sodium channel current ( $I_{Na}$ ) at cell-to-cell junctional contacts between neonatal rat ventricular myocytes (NRVMs) (Fig. 1A) [21].  $\beta$ adp1 had no effect on sodium channel activity in non-junctional membranes distal from cell-cell contacts, or on whole cell  $I_{Na}$ , over similar time courses. We used scanning ion conductance microscopy (SICM) –guided smart patch clamp in NRVM cultures to investigate junctional sodium currents over a longer period (Fig. 1A). Similar to what was observed in the earlier study, 50  $\mu$ M  $\beta$ adp1 reduced junctional  $I_{Na}$  significantly after 30 minutes (Fig 1B). However, longer exposure to  $\beta$ adp1 prompted further reductions of junctional  $I_{Na}$ , reaching levels  $\sim$  1/3 that of untreated cells after 60 minutes, thereafter leveling off to similar reductions in activity at 90 and 120 minutes (Fig 1B). No change in  $I_{Na}$  occurred at junctional contacts in response to scrambled control peptide or in non-junctional membranes in response to  $\beta$ adp1 or control peptide (Fig. 1C). The level of sodium channel activity in non-junctional NRVM membranes was similar to the suppressed levels of  $I_{Na}$  measured after 60 minutes or more of exposure to  $\beta$ adp1 in junctional contacts (Fig 1C).

Confocal immunolabeling of NRVMs revealed  $\beta$ 1 signals juxtaposed with Cx43 GJs at cell-to-cell contact sites in untreated cells (Fig. 1D) or cells treated with control peptide for 60 minutes consistent with localization at perinexal domains (Supplemental Fig. 1). This labeling occurred as sequential punctate domains of Cx43 and  $\beta$ 1 signal at junctional contacts, which though intense and side-by-side, did not appear to directly co-localize or overlap. By contrast, following treatment of NRVMs with 50  $\mu$ M  $\beta$ adp1 for 60 minutes, dissociation of juxtaposed side-by-side Cx43 and  $\beta$ 1 signals was observed at junctional contacts

(compare insets Fig 1D), together with qualitatively lower amounts of  $\beta 1$  immunolabeling. This reduction was confirmed by image quantification, which indicated that the density and counts of immunolabeled  $\beta 1$  at junctional contacts were significantly reduced in NRVMs exposed to  $\beta adp1$  (Fig 1E). Junctional Cx43 immunolabeling density or counts did not show any significant change in response to  $\beta adp1$  over 60 minutes, relative to controls. Similarly, and in line with whole cell sodium channel activity measurements, the total % areas of Cx43 and  $\beta 1$  immunolabeling normalized to cell area did not vary significantly between untreated cells, and NRVMs treated with 50  $\mu M$   $\beta adp1$  or control peptide for 60 minutes (data not shown). Further characterization of  $\beta adp1$  over an acute treatment time-course was provided by electric cell substrate impedance sensing (ECIS) of 1610 cells stably transfected with SCN1B ( $\beta 1$ ) and GFP (1610 $\beta 1$  cells; Fig 1F). In ECIS, changes in relative resistance enable assay of levels of intercellular adhesion (Fig. 1G). Extending previous work, we confirmed that relative to vehicle and scrambled controls, a relatively low concentration of  $\beta adp1$  (10  $\mu M$ ) was sufficient to prompt reductions in relative resistance/intercellular adhesion in 1610 $\beta 1$  cells following 5 hours of exposure of the cells to the peptide (Fig 1H).

In sum, the results shown in Figure 1 indicate that disruption of  $\beta 1$ -adhesion mediated by treatment with  $\beta adp1$  over acute time courses of up to 5 hours is associated with reductions in junctional  $I_{Na}$  density and SCN1B ( $\beta 1$ ) immunolabeling levels, with global  $I_{Na}$  and SCN1B ( $\beta 1$ ) levels across the entire cell membrane remaining unaffected.

**Identification of Novel SCN1B Mimetic Inhibitory and Monomeric Agonist Peptides:** Modeling *in silico* indicates that  $\beta adp1$  likely mediates its effects over 30 to 60 minute time courses by selectively binding to the  $\beta 1$  extracellular Ig domain (Figure 2A, B). Experimental and modeling data further suggests that this interaction inhibits trans-adherent interactions between apposed  $\beta 1$  molecules on neighboring cell membranes [21, 39, 40]. Our approach to design of  $\beta adp1$  as an inhibitor of  $\beta 1$ -mediated adhesion was motivated in part by a strategy reported by groups working on two other cell adhesion molecules; N-cadherin [41] and desmosglein-2 [42]. These groups identified peptides in the Ig domain of these molecules that when provided in isolation inhibited adhesive interactions, but also described an approach to promoting adhesion based on dimerization of inhibitory monomers.

A second consideration of our approach to  $\beta 1$  drug design stemmed from data we obtained that molecules of greater than 3 kD do not efficiently penetrate the extracellular space of IDs in vivo [27]. The  $\beta adp1$  monomer has a molecular mass of 2.6 kD and so does not exceed this threshold (Table 1). Thus, consistent with  $\beta adp1$  having potential to target ID-localized  $\beta 1$  we found that the peptide had quantifiable effects on perinexus structure in Langendorf-perfused guinea pig hearts [21]. A dimeric peptide comprising  $\beta adp1$  repeats exceeds the 3kD threshold, likely negating its ability to act as an ID-localized  $\beta 1$  agonist in the heart in vivo. As a first step in the generation of  $\beta 1$  agonist that could penetrate IDs, we used *in silico* modeling and ECIS to identify short peptides within  $\beta adp1$  that had potential to interact with  $\beta 1$  and inhibit  $\beta 1$ -mediated adhesion (Supplemental Fig. 2). Based on this approach we found that short peptides near the CT of  $\beta adp1$  maintained propensity to interact with the  $\beta 1$  Ig domain and disrupt adhesion. Figure 2C shows one of these peptides, the 6mer LQLEED (Molecular mass ~ 746 daltons), organized in a low energy pose with  $\beta 1$ , with its NT leucine residues in a hydrophobic pocket on the Ig domain adhesion surface, within which portions of  $\beta adp1$  also appear to embed (compare Figs. 2B and C).

Next, we synthesized LQLEED, and applied the peptide at a 10  $\mu$ M concentration in ECIS on 1610 $\beta 1$  cell monolayers (Figure 3). Similar to when low concentrations of  $\beta adp1$  are used, we found that LQLEED caused a reduction in relative resistance like that observed for the larger 19 aa peptide – consistent with the peptide inhibiting intercellular adhesion between 1610 $\beta 1$  cells. By contrast, short peptides from nearer the  $\beta adp1$  NT showed no evidence of similar inhibitory activity. (Supplemental Fig 2). The inhibitory effect of LQLEED is further illustrated in Figure 3A, where it is shown to reduce in relative resistance in 1610 monolayers following 5 hours of exposure of the cells to the peptide.

To investigate whether dimerization of short CT inhibitory monomers could generate dimeric agonists, we synthesized LQLEEDERF-G-LQLEEDERF (Table 1). This dimeric peptide, which is called PS2L, is a sequential repeat of the CT-most 9 amino acids of  $\beta adp1$  including the LQLEED sequence spaced by a glycine (G) linker. We also synthesized a dimeric peptide of identical sequence, except that it had cysteine residues at its NT and CT. This novel peptide, called PS2C (CLQLEEDERF-G-LQLEEDERFC), was designed to be cyclizable via disulfide bonding between its cysteines (Table 1). Importantly, the molecular

mass of the PS2L and PS2C dimers are approximately 2395 and 2602 daltons, which like  $\beta$ adp1 and LQLEED falls below the 3 kD threshold for ID-penetration. Results from PS2L and PS2C will be described in detail in the following section – but to summarize in ECIS assays, resistance levels induced by these dimeric peptides in 1610 $\beta$ 1 cells were notably elevated over controls (Figs. 3B).

**Differential Effects of Monomeric and Dimeric Mimetic Peptides Targeting  $\beta$ 1 on Cell Adhesion and  $\beta$ 1 Immunolabeling over Prolonged Time-courses:** Whilst  $\beta$ adp1 and LQLEED reduced intercellular adhesion over courses of 5 hours or less, we found differential effects of the monomers on cellular adhesion over longer times periods. Up to 20-hours, the effects of monomers on cell adhesion were similar to that at 5 hours, with decreases in resistance, compared to controls (Figure 3A, C, E). However, after 24-30 hours a shift occurred, wherein resistance appeared to increase from the lower levels induced by the peptides acutely - as indicated by the green arrow in Figure 3A. In some ECIS runs, the rise in resistance in monomer-treated cells eventually exceeded that of control cells – as shown for  $\beta$ adp1 in Figure 3A. Whilst this increase did not always go above control levels, it was sufficient on average that by 40 hours post-treatment, effects of  $\beta$ adp1 and LQLEED on cellular resistance were no longer significantly below those of controls (Compare Figs. 3C and 3G). We performed similar long-term ECIS assays on the PS2L and PS2C dimeric peptides. Paradoxically with respect to the monomeric peptides, linear PS2L and cyclized PS2C dimers both significantly increased resistance in 1610 $\beta$ 1 cells (Figs. 3D, F and H). The agonistic effects of the dimers were notably more potent than those elicited by the monomers, reaching both higher levels of significance and persisting over the entire 40 hour time course of the experiment.

Immunolabeling was undertaken to probe the effect of the mimetic peptides on 1610 $\beta$ 1 cells over a 48 hour time course using an antibody to the NT Ig domain of  $\beta$ 1 (Fig. 4). 1610 $\beta$ 1 cells incubated with 50 $\mu$ M Biotin- $\beta$ adp1 showed accumulation of the peptide, which peaked at around 24 hours, declining at 48 hours. Interestingly, immunolabeling for the  $\beta$ 1 protein itself indicated a steady increase in abundance in 1610 $\beta$ 1 cells in response to  $\beta$ adp1, which reached maximal levels at 48 hours, relative to control cells (Fig. 4). Prompted by this observation we examined what effects that LQLEED and PS2L had on  $\beta$ 1 immunolabeling at 48 hours (Fig. 5A-E). As was the case for  $\beta$ adp1, in response to LQLEED  $\beta$ 1 immunolabeling in 1610 $\beta$ 1



cells appeared to be increased at 48 hours (Fig. 5C). High magnification images indicated that this increased immunolabeling was cell-wide, including within the cytoplasm, with occasional evidence of increased intensity of immunolabeling at cell borders. PS2L treatment also led to cell-wide increases in  $\beta 1$  immunolabeling at 48-hours. Interestingly, we also noted that treatment with PS2L prompted a distinct increase in signal at cell borders, relative to controls and the monomeric peptides (Fig. 5D, E). The increase in cell border localization observed with the dimeric peptide was not seen for the monomers.

**$\beta$ adp1 and PS2L Increase Cleavage of  $\beta 1$  via Regulated Intramembrane Proteolysis (RIP):**  $\beta 1$  has been reported to undergo a process of sequential intramembrane proteolysis (RIP) by BACE1 and  $\gamma$ -secretase [36, 38]. RIP results in the production of a soluble intracellular domain (ICD) from the CT of full length  $\beta 1$  that is translocated to the nucleus, with correlated effects on gene expression, including VGSC sub-units. We sought to determine if  $\beta 1$ -targeting peptides effect the RIP process in a manner that may parallel changes in  $\beta 1$ -mediated intercellular adhesion and immunolabeling. First, to confirm that  $\beta 1$  underwent RIP in 1610 $\beta 1$  cells, we treated cells with the  $\gamma$ -secretase inhibitor DAPT. In the presence of DAPT, together with an antibody against the CT of  $\beta 1$ , it was found that the 19 kD Carboxyl-Terminal Fragment (CTF) accumulated in Western blots from cells sampled at 6, 24 and 48 hours following initiation of treatment (Fig. 6A). Without DAPT treatment the 19 kD CTF was typically undetectable. Next, we co-treated cells with DAPT in the presence of  $\beta$ adp1 (Fig. 6). As expected, all treatments that included DAPT resulted in increased levels of the CTF (Fig. 6A). However, compared to DAPT alone,  $\beta$ adp1+DAPT significantly increased CTF levels at 6, 24, and 48 hours post treatment (Fig. 6B). Cells treated with a control peptide showed no similar increase in the 19 kD CTF (Supplemental Fig 3). We noted that  $\beta$ adp1 alone increased the 19 kD fragment at 24 hours of treatment relative to control levels on occasion (Fig. 6A). However, this was not consistent between experiments and we did not analyze this sporadic effect further. The abundance of the full length  $\beta 1$  (37 kD band) was elevated at 6 hours post-treatment by  $\beta$ adp1 in DAPT co-treatments (Fig. 6C), but other than this modest effect, the 37 kD band showed no consistent variation by treatment or time-point on Western blots.

PS2L+DAPT also significantly increased the CTF of  $\beta 1$  at 6 hours post treatment compared to DAPT alone, though not at 24 and 48 hours (Fig. 7). PS2L alone did not appear to have a consistent effect on CTF levels. In response to combinatorial DAPT and PS2L treatments, full length  $\beta 1$  showed no change at the 6 and 24 hour time points, though at 48 hours Western blots revealed a significant reduction of the 37 kD band relative to controls.

To explore whether inhibiting  $\beta 1$  RIP may disrupt the longer term gain-of-function effect of  $\beta adp1$  on intercellular adhesion in 1610 $\beta 1$  cells, we repeated ECIS experiments with  $\beta adp1$  treatment over 48 hours, including a  $\beta adp1$  + DAPT treatment (Fig. 8C). We found that a co-treatment of  $\beta adp1$  and DAPT resulted in prolongation of the inhibitory effect, with relative resistance significantly decreased across the entire length of the experiment (Fig. 8D-F). These results would be consistent with contribution of RIP to the longer term gain-of-function effect on intercellular adhesion observed with treatment with  $\beta adp1$  over periods of greater than 24 hours.

## **DISCUSSION**

In the present study, the effects of targeting VGSC  $\beta 1$  with amino acid sequences mimicking its extracellular immunoglobulin (Ig) domain were investigated. A short sequence (LQLEED) was characterized at the C-terminus of  $\beta adp1$  - a previously reported 19 amino acid mimetic of the SCN1B Ig domain [21]. LQLEED inhibited cell-to-cell adhesion in 1610  $\beta 1$ -expressing cells in a manner comparable to  $\beta adp1$ . Dimeric peptides incorporating repeats of LQLEED were found to demonstrate agonist-like activity, paradoxically increasing adhesion in 1610  $\beta 1$  monolayers in contrast to the inhibitory effects of monomeric peptides. New insights into the activity of SCN1B mimetic peptides over time courses longer than previously reported were provided, including that: 1) The  $\beta adp1$  monomer reduced peak sodium current at intercellular contacts between cardiomyocytes, associated with reductions in  $\beta 1/\beta 1B$  immunolabeling at these junctional regions; 2) The inhibitory effects of monomeric  $\beta adp1$  and LQLEED on cell adhesion in 1610  $\beta 1$  expressing monolayers was biphasic, being sustained for time courses of up to 5 hours, but thereafter blunted; 3) Conversely, the adhesion-promoting effects of dimeric peptides were maintained over 48 hours; 4) The biphasic time course of  $\beta adp1$  on cell adhesion in 1610  $\beta 1$ -expressing cells was correlated with increased levels of a C-terminal fragment (CTF) of  $\beta 1$  - a known intermediate product of the regulated intramembrane proteolysis (RIP) of  $\beta 1$  [36, 38] and that 5) The second phase of the biphasic effect of  $\beta adp1$  appeared to be prevented by co-treatment with DAPT - an inhibitor of  $\gamma$ -secretase a peptidase involved in the final step of  $\beta 1$  RIP [36, 38]. In sum, our results suggest pathways to pharmacological development of agonists and antagonists targeting the main beta subunit (i.e., SCN1B) of the principle sodium channel found in the mammalian ventricle [13, 17], as well as complexities in the response of  $\beta 1$ -expressing cells to such pro-drugs.

When designing the peptides derived from the initial  $\beta adp1$  sequence, we ensured biologically relevant residues were included. A human population study of SCN1B mutants found an R85H variant in a patient with atrial fibrillation [34]. When the mutant  $\beta 1$  subunit was expressed in Chinese hamster ovary cells, sodium current via  $Na_v1.5$  was reduced [34]. Interestingly, this mutation is also associated with epilepsy [14, 43]. The full  $\beta adp1$  sequence is derived from residues 67-86 of  $\beta 1$ , which includes amino acid R85.

Another mutation one residue removed from the  $\beta$ adp1 sequence, E87Q, has been associated with Brugada syndrome [35]. Thus, combined with our *in silico* modeling and experimental ECIS results (Supplemental Fig. 2) we focused on the carboxyl-terminus (CT) of  $\beta$ adp1 when developing short dimeric and monomeric mimetic sequences of the  $\beta$ 1/ $\beta$ 1B Ig domain. Interestingly, the control peptide  $\beta$ adp1-R85D, does not appear to cause significant changes in accumulation of the CTF compared to DMSO, unlike  $\beta$ adp1 – again reinforcing the concept that bioactivity resides in the CT region of the sequence (Supplemental Fig. 3).

Although the focus is on  $\beta$ 1 in this study, there is an alternatively spliced variant of SCN1B named  $\beta$ 1B.  $\beta$ 1B is formed by retention of an intron that results in a novel CT that lacks the transmembrane domain of  $\beta$ 1 [44, 45]. Thus,  $\beta$ 1B is not thought to be anchored in the cell membrane and is widely held to be secreted, except in one report where  $\beta$ 1B was found to be retained in the cell membrane when co-expressed with Nav1.5 in HEK cells [14]. Since  $\beta$ 1B is exclusively retained at the membrane in the presence of Nav1.5, the predominant cardiac VGSC isoform, this suggests a unique role for  $\beta$ 1B in the heart, including potential to act as an adhesive substrate. Although  $\beta$ 1B differs at the CT from  $\beta$ 1, it does contain the same Ig domain that appears to be necessary for adhesive interactions mediated by the canonical (i.e. the non-alternatively transcribed)  $\beta$ 1 isoform. This leads to the question of whether  $\beta$ adp1 could mimic a natural function of  $\beta$ 1B in regulating  $\beta$ 1-mediated cell adhesion, as well as modulating  $\beta$ 1 RIP, since  $\beta$ adp1 is a sequence common to both  $\beta$ 1B and  $\beta$ 1. Interestingly,  $\beta$ 1B loss of function mutations are implicated in various cardiac and neural pathologies [46], including Long QT-Syndrome [47], epilepsy [48, 49], Dravet syndromes [50, 51], Brugada syndrome [35, 52], and atrial fibrillation [34, 53]. Importantly, the R85D and E87Q mutations near or within the  $\beta$ adp1 sequence can occur in both  $\beta$ 1 and  $\beta$ 1B. Further work is needed to determine the differing roles of  $\beta$ 1 and  $\beta$ 1B and in regard to the SCN1B ( $\beta$ 1/ $\beta$ 1B) peptides studied herein.

To further understand how short peptides mimicking the  $\beta$ 1/ $\beta$ 1B Ig domain prompt changes to  $\beta$ 1-mediated adhesion, we investigated effects of our peptides on RIP of  $\beta$ 1.  $\beta$ 1 RIP occurs in two steps. First, BACE1 cleaves the extracellular Ig domain, leaving the 19kD CTF composed of the transmembrane and intracellular domains [36, 38]. Under normal conditions, the 19kD CTF is subsequently cleaved by  $\gamma$ -secretase to produce an intracellular domain (ICD) that translocates to the nucleus and results in

transcriptional changes, including differential changes in gene expression of VGSC genes, as well as genes responsible for cell adhesion, immune response, cellular proliferation, and calcium ion binding [38]. It has been shown in MDA-MB-231 cells, a breast cancer cell line, that over-expression of full length  $\beta 1$ -GFP or ICD-GFP alone is sufficient to increase sodium currents, whereas expression of  $\beta 1$ STOP-GFP, which does not include the ICD, does not increase sodium current [54]. This indicates that the SCN1B mimetic peptides that are the focus of the present study may be capable of modulating transcriptional effects mediated by the ICD, as well as causing changes to sodium currents. Whether or not peptides such as  $\beta$ adp1 and LQLEED have this potential represents a fruitful line of inquiry for ongoing study.

Aside from  $\beta 1$ , there are multiple other substrates of similar RIP processes, including the  $\beta$ -amyloid precursor protein (APP) implicated in Alzheimer's disease and Notch. The cleavage process of APP that produces A $\beta$  plaques involves sequential activity of  $\beta$ -secretase and  $\gamma$ -secretase. The resulting intracellular domain (AICD) also shows nuclear signaling activity, including effects such as endogenous defense against Alzheimer's disease [55] and regulating neurogenesis [56]. Notch is a transmembrane protein that is sequentially cleaved by ADAM10 then  $\gamma$ -secretase once it is in the membrane [57]. Comprehending the much larger body of work surrounding RIP of both APP and Notch, as well as other voltage gated ion channel subunits and cell adhesion molecules, appears to offer the prospect of further progress on understanding the  $\beta 1$  RIP process and targeting it for therapeutic purposes [58].

One potential downstream method by which increasing  $\beta 1$  RIP results in increases in cellular adhesion as seen in our various ECIS assays, may be via increased abundance of the  $\beta 1$  subunit itself. The literature has not shown whether the  $\beta 1$  ICD affects levels of VGSC  $\beta$  subunit transcription, but it does upregulate VGSC  $\alpha$  subunit transcription [36, 38]. Localization of  $\alpha$  and  $\beta$  subunits are closely related, with  $\beta$  subunits usually found in regions of high  $\alpha$  subunit density [59]. Our immunofluorescent data also indicates an increase in  $\beta 1$  abundance in the 1610 $\beta 1$  cells after treatment with SCN1B ( $\beta 1/\beta 1B$ ) mimetic peptides. Previously, we have shown that  $\beta 1$  is important in maintaining inter-membrane adhesion at the perinexus, a specialized nanodomain directly adjacent to gap junctions in the intercalated disc that is the proposed region where ephaptic coupling takes place in cardiac tissues [21]. Knockout of the  $\beta 1$  protein in mice is fatal by postnatal

day 21 [60] and disrupting  $\beta 1$  trans-adhesion in the perinexus *ex vivo* results in loss of GJ-associated VGSCs, conduction slowing and arrhythmias [21]. By instead increasing the levels of  $\beta 1$ , these rationally designed peptides may thus have antiarrhythmic treatment or prevention abilities, albeit that our present data suggests that there may be acute pro-arrhythmic effects of such approach to therapy. Ongoing studies may well address the latter issue, but until such time it is probably best that assessments of the potential long-term clinical benefits of such strategies be taken with caution.

One question raised by our studies, and by others, is whether or not RIP of  $\beta 1$  takes place at the cell membrane or subcellularly. Our immunofluorescent data indicates that  $\beta 1$  heterologously expressed in 1610 cells is mainly cytoplasmic. This observation is similar to those made by others in the MDA-MB-231  $\beta 1$  expressing cells [54] and Madin-Darby canine kidney cells [61]. In the MDA-MB-231 cells  $\beta 1$  has been shown to colocalize with the endoplasmic reticulum, the endolysosomal pathway and the nucleus [54]. From our immunofluorescence experiments we find that there is a significant uptake of  $\beta adp 1$  into the cells at 24 hours post-treatment. The greatest increase in  $\beta 1$  abundance occurs at 48 hours post-treatment, which aligns with the increase we see in resistance in ECIS. There is little difference in  $\beta 1$  levels between DMSO and  $\beta adp 1$ -treated cells up to this point. We also see the greatest increase of CTF with  $\beta adp 1 + DAPT$  at 24 hours post-treatment, corresponding to the timing of maximal uptake of the peptide by cells. This suggests that the internalization of the peptide is important in causing the observed increase in RIP. Thus, the literature, together with data presented here, suggests that a considerable fraction of  $\beta 1$  RIP may occur intracellularly, so  $\beta adp 1$  may affect the process to a greater extent once it has been taken up by the cells. This indicates potential for delivery systems such as small extracellular vesicles loaded with SCN1B ( $\beta 1/\beta 1B$ ) mimetic peptides that can be directly delivered inside the cells. Previous work has shown potential for drug delivery with bovine milk derived extracellular vesicles, and our lab has optimized a protocol for isolating large quantities of small extracellular vesicles to allow for loading and treatment of the vesicles [62-64]. This being said, evidence remains that the majority of  $\beta 1$  RIP can and does occur at the plasma membrane [37, 54].  $\beta 1$  is S-palmitoylated, and when palmitoylation is inhibited by a C162A mutation in  $\beta 1$ , this results in decreased  $\beta 1$  in the plasma membrane and decreased RIP [37]. Therefore, ongoing work

is needed to establish the location of  $\beta 1$  RIP in different biological settings, both in health and disease and to compare efficacy of extracellular versus intracellular delivery systems for peptides targeting SCN1B.

We have previously hypothesized the function of  $\beta 1$  in the perinexus is to regulate intermembrane spacing via trans-adhesion and our peptides were initially designed with perinexal trans-interaction in mind [21]. While the initial and late effects of the  $\beta adp1$  monomer may be respectively explained by an acute disruption of trans-adhesion among  $\beta$  subunits, and possibly a subsequent increase in SCN1B level via downstream effects on RIP, the basis for the sustained increase in resistance (and thus intercellular adhesion) in ECIS after treatment with dimeric PS2L awaits mechanistic explanation. Other groups have demonstrated that dimer mimetics of adhesion molecules result in increased adhesion, namely in desmoglein-2 and N-cadherin [41, 42]. However, if PS2L increased adhesion by facilitating trans-adhesion among  $\beta 1$  subunits, this would be at odds with how the increased RIP of  $\beta 1$  is triggered by both  $\beta adp1$  and PS2L, with one inhibiting and one facilitating trans-adhesion. Therefore, more work is required to determine how PS2L facilitates adhesion while simultaneously increasing the rate of  $\beta 1$  RIP at early timepoints.

In summary, we show that  $\beta 1$  mimetic peptides increase the amount of regulated intramembrane proteolysis that  $\beta 1$  undergoes in 1610 $\beta 1$  cells. Although we do not provide evidence that the  $\beta 1$  mimetics studied herein directly affect transcription of  $\beta$  subunits of VGSCs, we see evidence that  $\beta 1$  abundance is increased in treated cells and previous work has shown changes to VGSC  $\alpha$  subunit transcription in response to  $\beta 1$  ICD increase [38]. We also as yet have no direct evidence that increased resistance in ECIS corresponds to decreased perinexal width and changes to heart rhythm, so these are next steps. To conclude, we have identified novel SCN1B ( $\beta 1/\beta 1B$ ) mimetic peptides with potential to inhibit or promote intercellular  $\beta 1$ -mediated adhesion, possibly including by effects on  $\beta 1$  RIP, suggesting paths to development of anti-arrhythmic drugs targeting the perinexus.

## **MATERIALS AND METHODS**

### **Peptide synthesis**

Peptides used in the study are summarized in Table 1. Peptides were synthesized by and obtained from LifeTein (Somerset, NJ) modified by N-terminal acetylation, C-terminal amidation, and TFA removal. Peptides were solubilized in DMSO to the concentration shown by experiment, ranging from 10 $\mu$ M-100 $\mu$ M.

### **Neonatal rat ventricular myocyte (NRVM) isolation**

NRVM isolation was performed as previously described [21]. NRVM isolation procedures conformed to the UK Animal Scientific Procedures Act 1986. In brief, isolated ventricles were taken from one-day-old rat pups anesthetized with a lethal dose of isoflurane. The ventricles were sectioned into small cubes and processed using mechanical dissociation (gentleMACS) and enzymatic degradation (neonatal heart dissection kit; Miltenyi Biotec, Bergisch Gladbach, Germany). The cell suspension was then filtered and the cells were plated onto glass-bottom dishes (MatTek Corp., Ashland, MA) in M199 media supplemented with newborn calf serum (10%), vitamin B12, glutamate and penicillin/streptomycin (1%). Myocytes were allowed to grow and establish connections for 3–4 days *in vitro*. Peptide treatments were applied to cell monolayers the specified amount of time (Fig. 1) prior to  $I_{Na}$  measurements.

### **Scanning ion conductance microscopy (SICM) guided smart patch clamp**

A type of SICM, called hopping probe ion conductance microscopy, was combined with cell-attached recordings of cardiac sodium channels from NRVM monolayers, as previously described [21], to assess  $I_{Na}$  at cell-to-cell contact sites. Currents were recorded in cell-attached mode using an Axopatch 200A/B patch-clamp amplifier (Molecular Devices, Sunnyvale, CA), and digitized using a Digidata 1200B data acquisition system and pClamp 10 software (Axon Instruments; Molecular Devices, Sunnyvale, CA). Cell-to-cell junctional sites were identified using a sharp scanning nano-probe (40–50 M $\Omega$ ), followed by controlled increase of pipette diameter (20–25 M $\Omega$ ) for capture of active sodium channel clusters. The external solution contained (in mM): KCl 145, Glucose 10, HEPES 10, EGTA 2, MgCl<sub>2</sub> 1, and, CaCl<sub>2</sub> 1



(300 mOsm and pH 7.4). The internal (pipette) solution contained (in mM) NaCl 135, TEA-Cl 20, CsCl 10, 4AP 10, Glucose 5.5, KCl 5.4, HEPES 5, MgCl<sub>2</sub> 1, CaCl<sub>2</sub> 1, NaH<sub>2</sub>PO<sub>4</sub> 0.4 and CdCl<sub>2</sub> 0.2 (pH 7.4). The voltage-clamp protocol was made up of sweeps testing potentials from -70 to +30 mV from a holding potential of -120 mV.

### **Molecular modeling**

Molecular modeling was used as described previously to simulate the docking of  $\beta$ adp1 and LQLEED with the homology model of  $\beta$ 1 using Maestro (Maestro, Schrödinger, LLC, New York, NY) [21].

### **Whole-cell I<sub>Na</sub> recordings in NRVMs**

Whole cell sodium current recordings were collected as previously described [21]. Whole-cell I<sub>Na</sub> was recorded from NRVMs in low-sodium extracellular solution containing the following (in mM): CsCl 130, NaCl 11, Glucose 10, HEPES 10, MgCl<sub>2</sub> 2, CaCl<sub>2</sub> 0.5, CdCl<sub>2</sub> 0.3, adjusted to 7.4 with CsOH. The intracellular (pipette) solution contained (in mM): Cesium methanesulfonate (CsMeS) 100, CsCl 40, HEPES 10, EGTA 5, MgATP 5, MgCl<sub>2</sub> 0.75, adjusted to pH 7.3 with CsOH. Pipettes were pulled from the borosilicate glass microelectrodes and had a resistance of 3–4 M $\Omega$ . Sweeps were initiated from the holding potential of -100 mV to test potentials ranging from -75 to +20 mV in 5 mV increments. Peak current was measured between -30 and -40 mV. Whole cell capacitance ranged between 9 and 16 pF. Current density (in pA/pF) was calculated as the ratio of the peak current to cell capacitance.

### **Heterologous expression of $\beta$ 1 in 1610 cells**

We have previously described how Chinese hamster lung 1610 cells have been used as a heterologous expression system [21]. These cells were used to measure SCN1B/ $\beta$ 1 mediated adhesion and the regulated intramembrane proteolysis of SCN1B/ $\beta$ 1 and they do not endogenously express SCN1B/ $\beta$ 1 [65].

### **Electric cell-substrate impedance sensing (ECIS)**

Resistance of adherent monolayers of 1610 cells expressing SCN1B/ $\beta$ 1 was measured using an ECIS Z $\Theta$  system (Applied Biophysics) over the entire range possible, (62.5-64000 Hz). For analysis, we used the

resistance calculated from the 4000 Hz measurement as previously shown [21]. Cells were plated on 8-well dishes (8W10E+, 40 electrodes per well, Applied Biophysics) at a concentration of 500,000 cells/mL, 300  $\mu$ L per well. Impedance was measured continuously over the treatment time courses, and resistance is calculated as the real component of impedance.

### **Fluorescent Immunolabeling**

Fluorescent immunolabeling was performed on adherent monolayers of 1610 cells expressing SCN1B/ $\beta$ 1 fixed with 4% paraformaldehyde for 10 minutes. Samples were labeled with a rabbit polyclonal antibody against an amino-terminal region of  $\beta$ 1 (Epitope: <sub>44</sub>KRRSETTAETFTFWTFR<sub>60</sub>). We have previously published validation results for this antibody [21]. Samples were then labeled with goat anti-rabbit AlexaFluor 568 (1:2000, ThermoFisher Scientific) secondary antibodies for confocal microscopy. Nuclei were stained with Hoechst 33342 for 10 minutes (1:30,000, Invitrogen).

### **Confocal microscopy**

Confocal microscopy was done with a TCS SP8 laser scanning confocal microscope equipped with a Plan Achromat 63x/1.4 numerical aperture oil immersion objective and a Leica HyD hybrid detector (Leica) using approach reported previously [21]. Imaging of each fluorophore was performed sequentially, and the excitation wavelength was switched at the end of each frame.

### **Western blotting**

Whole cell lysates were collected from 1610 cells expressing SCN1B/ $\beta$ 1 using RIPA buffer on ice while being agitated on a platform rocker. Lysates were then pulled through 22 gauge and 17 gauge syringes 5 times each, vortexed, and spun for 30 minutes at 10,000g at 4°C before being snap-frozen in liquid nitrogen. Lysates were electrophoresed on 4-20% TGX Stain-free gels (BioRad) and were then transferred to polyvinylidene difluoride (PVDF) membrane using a semi-dry method with a Trans-Blot Turbo system for 7 minutes at 25V (BioRad). The membranes were probed with the rabbit polyclonal antibody against an amino-terminal region of  $\beta$ 1 [21], or a rabbit polyclonal antibody against the carboxy-terminal of  $\beta$ 1 (Cell Signaling Technology, D4Z2N) each diluted at 1:1000. These were followed by a goat anti-rabbit HRP-

conjugated secondary antibody (JacksonImmuno). Signals were then detected using SuperSignal West Femto Maximum Sensitivity Substrate (ThermoFisher Scientific) and imaged with a ChemiDoc MP imager (BioRad).

### **Statistical analysis**

Data is presented as mean  $\pm$  SEM unless specified. Statistical analysis was performed using one-way ANOVA with Dunnett's multiple comparisons test or one-sample students t-test with a theoretical mean of 1 in the case of the Western Blot data. All statistical analysis was performed using GraphPad Prism v.10.0.2. A  $p < 0.05$  was considered statistically significant.

## **FIGURE LEGENDS**

**Figure 1. Acute effects of  $\beta$ adp1 on  $I_{Na}$ ,  $\beta$ 1 density and intercellular adhesion:** **A)** Surface of neonatal rat ventricular myocytes (NRVMs) at a cell-to-cell contact imaged by Scanning Impedance Conductance Microscopy (SICM). A cartoon of a patch pipette is shown near a cell-to-cell contact. **B)** Summary plot of  $I_{Na}$  from junctional sites over a 120 minute time course following treatment with 50  $\mu$ M  $\beta$ adp1 (Untreated Control: n = 12;  $\beta$ adp1 30 minutes: n = 8;  $\beta$ adp1 60 minutes: n = 7;  $\beta$ adp1 90 minutes: n = 8;  $\beta$ adp1 120 minutes: n = 10) **C)** Summary plot of  $I_{Na}$  from junctional and non-junctional sites in presence or absence  $\beta$ adp1 or scrambled  $\beta$ adp1 control peptide (50  $\mu$ M) after 60 minutes (Junctional untreated Control: n = 12; Junctional  $\beta$ adp1: n = 8; Junctional scrambled  $\beta$ adp1: n = 6; Non-Junctional untreated Control: n = 10; Non-Junctional  $\beta$ adp1: n = 12; Non-Junctional scrambled  $\beta$ adp1: n = 6) **D)** Representative confocal images of NRVMs immunolabeled for Cx43 (red) and  $\beta$ 1 (green) of control NRVMs or after treatment with  $\beta$ adp1 50  $\mu$ M for 60 minutes. Insets show magnified views of junctional Cx43 (red) and  $\beta$ 1 (green) signals. **E)** Quantification of immunolabeling density of Cx43 (left hand bar chart) and  $\beta$ 1 (right hand bar chart) in untreated NRVMs and cells treated with  $\beta$ adp1 or scrambled  $\beta$ adp1 control peptide at 50  $\mu$ M for 60 minutes n $\geq$ 3 images per group. **F)** Representative confocal image of 1610 cells expressing  $\beta$ 1 and GFP (green) immunolabeled for  $\beta$ 1 (red). **G)** Diagram illustrating Electric Cell-Substrate Impedance Sensing (ECIS) and measurement parameters derived, including relative resistance of the monolayer overlying the electrode, which provides an assay of intercellular adhesion levels. **H)** ECIS comparison of effects on relative resistance in monolayers of 1610 cells expressing  $\beta$ 1, at 5 hours following treatment with vehicle control solution (n=6) or  $\beta$ adp1 or scrambled control  $\beta$ adp1 at 10  $\mu$ M. \*p<0.05, \*\*p<0.01.

**Figure 2. In silico modeling of binding of  $\beta$ adp1 and LQLEED monomeric inhibitory peptides to the  $\beta$ 1 Immunoglobulin domain.** **A)** Homology model of the  $\beta$ 1 extracellular domain based on the SCN3B/ $\beta$ 3 crystal structure [21], with  $\beta$ adp1 (stick model) docked *in silico* in a low-energy conformation with the adhesion surface of the  $\beta$ 1 Immunoglobulin (Ig) loop. **B)** Rendering of  $\beta$ adp1 (ball and stick model) docked to the predicted Ig adhesion surface of a  $\beta$ 1 homology model. This perspective of the  $\beta$ 1 Ig domain adhesion surface reveals a hydrophobic pocket, within which hydrophobic amino acids towards the C-terminus

of  $\beta$ adp1 (e.g., LQL) are predicted to interact with  $\beta$ 1. Positive and negatively charged moieties on the adhesion surface of the  $\beta$ 1 Ig loop are shown in red and blue, respectively. **C)** Docking of CT sequence LQLEED from  $\beta$ adp1 with the  $\beta$ 1 homology model in a low-energy conformation. The hydrophobic LQL sequence of peptide in this pose also embeds in the aforementioned hydrophobic pocket of the  $\beta$ 1 Ig domain.

**Figure 3.  $\beta$ adp1 decreases intercellular adhesion in 1610 $\beta$ 1 cells, whereas  $\beta$ adp1-related dimeric peptides PS2C and PS2L increase adhesion.** **A)** Multi-well ECIS showing effects of  $\beta$ adp1 (red) and the  $\beta$ adp1-derived peptide monomer LQLEED (orange) on intercellular adhesion as assayed by relative resistance in ECIS compared to vehicle (DMEM/F12 culture media with 0.1% DMSO) control treated (black) cells over 48 hours. Both  $\beta$ adp1 and LQLEED decrease adhesion compared to control at 5 and 20 hours of treatment. There is a shift in the curve of  $\beta$ adp1 at approximately 30 hours indicating increased adhesion is likely occurring beyond this timepoint (green arrow). As a result, at 40 hours there is no significant difference between  $\beta$ adp1 or LQLEED compared to the control. **B)** Multi-well ECIS demonstrating effects of  $\beta$ adp1-derived dimers, PS2C (green) and PS2L (blue) on intercellular adhesion compared to vehicle control treated (black) cells over 48 hours. Both PS2C and PS2L increase relative resistance/adhesion compared to controls at 5 and 20 hours. At 40 hours, PS2L continues to significantly increase adhesion. **C-H)** Quantification of ECIS relative resistance as compared to vehicle control following treatment with 10  $\mu$ M  $\beta$ adp1 and 10  $\mu$ M LQLEED inhibitory monomers at 5 (**C**), 20 (**E**), and 40 (**G**) hours after treatment or PS2C and PS2L agonizing dimers at 5 (**D**), 20 (**F**), and 40 (**H**) hours after treatment.  $n \geq 3$  experimental replicates for each treatment, \* $p < .05$ , \*\* $p < .01$ .

**Figure 4.  $\beta$ adp1 increases  $\beta$ 1 immunolabeling over a 48 hour Time-Course.** Representative images of 1610 $\beta$ 1 cultures treated with 10  $\mu$ M biotinylated  $\beta$ adp1 or vehicle control over 48 hours, with sampling at 0.5, 1, 6, 24 and 48 hours. The top two rows are paired double-labelings of fluor-labeled streptavidin and  $\beta$ 1 immunolabeling within the same image. Biotin- $\beta$ adp1 levels peak at 24 hours during the time course, with prominent intracellular signal in evidence.  $\beta$ 1 immunolabeling abundance in the 1610 $\beta$ 1 cells appears to peak 24 hours later at the 48 hour time point. The bottom row indicates that  $\beta$ 1 immunolabeling abundance remains relative steady over time course in control cells.

**Figure 5.  $\beta$ adp1 and  $\beta$ adp1-derived monomeric and dimeric peptides increase  $\beta$ 1 immunolabeling at 48 hours of treatment.** 1610 $\beta$ 1 cells treated for 48 hours with vehicle control solution (**A**) or 10 $\mu$ M  $\beta$ adp1 (**B**) or the  $\beta$ adp1-derived peptides LQLEED at 10 $\mu$ M (**C**) or PS2L at 10 $\mu$ M (**D**). Each peptide shows an increase in  $\beta$ 1 immunolabeling abundance (red) compared to vehicle control cells at 48 hours. **E**) Magnified view of indicated portion of PS2L-treated cells. PS2L increased overall  $\beta$ 1 abundance in 1610 $\beta$ 1 cells, but unlike the other  $\beta$ adp1-derived peptides, it also increased the  $\beta$ 1 abundance at cell-cell borders (white arrows). Scale bar: 10 $\mu$ M.

**Figure 6.  $\beta$ adp1 increases Regulated Intramembrane Proteolysis (RIP) of  $\beta$ 1 following 6, 24 and 48 hours of treatment.** **A-C**) Western blot analysis demonstrating  $\beta$ adp1 effects on  $\beta$ 1 and the 19 kD  $\beta$ 1 Carboxyl Terminal Fragment (CTF) generated by RIP. Blot shows effects following treatment with vehicle control (DMEM/F12 culture media with 0.1% DMSO), 1  $\mu$ M DAPT, 50 $\mu$ M  $\beta$ adp1, 50 $\mu$ M  $\beta$ adp1 +1 $\mu$ M DAPT at 6, 24 and 48 hours of treatment. Below the  $\beta$ 1 immunoblot in (**A**) are  $\alpha$ -tubulin and total protein loading controls, showing approximately equal loading in each lane. **B**) Quantification of the  $\beta$ 1 CTF at 6, 24, and 48 hours normalized to vehicle control, indicating significant increases in the 19kD fragment when  $\beta$ adp1 treatment is present together with DAPT, relative to DAPT alone at the 6, 24 and 48 hours of a two-day treatment time course. DAPT inhibits  $\gamma$ -secretase, leading to cytoplasmic accumulation of the 19 kD  $\beta$ 1 CTF, the product of BACE-1-mediated proteolysis, enabling resolution of  $\beta$ adp1 effects on RIP. **C**) Quantification of full-length  $\beta$ 1 normalized to vehicle control in the presence of DAPT or  $\beta$ adp1 plus DAPT over the same time course. There is a significant increase in full-length  $\beta$ 1 6 hours after co-treatment with  $\beta$ adp1 and DAPT, but no significant difference in levels of  $\beta$ 1 persist at 24- and 48-hours.  $n \geq 3$  experimental replicates for each treatment, \* $p < .05$ , \*\* $p < .01$ .

**Figure 7. The PS2L dimer acutely increases the RIP of  $\beta$ 1, but not subsequently.** **A-C**) Western blot analysis showing effects on full-length  $\beta$ 1 and the  $\beta$ 1 CTF of treatment with vehicle control (DMEM/F12 with 0.1% DMSO), 1  $\mu$ M DAPT, 50 $\mu$ M PS2L, 50 $\mu$ M PS2L +1 $\mu$ M DAPT for 6, 24 and 48 hours. Below the  $\beta$ 1 immunoblots in (**A**) are  $\alpha$ -tubulin and total protein controls, showing approximately equal loading in each lane. **B**) Quantification of the  $\beta$ 1 CTF at 6, 24, and 48 hours normalized to vehicle control, indicates

a significant increase in the 19kD fragment occurs at the 6 hour time-point of a two-day treatment time course in response PS2L treatment in the presence of DAPT, but not at 24 and . C) Quantification of full-length  $\beta 1$  normalized to vehicle control in the presence of DAPT or PS2L plus DAPT over the same time course. There is a significant decrease in full-length  $\beta 1$  following 48 hours of co-treatment with  $\beta adp1$  and DAPT.  $n \geq 3$  experimental replicates for each treatment, \* $p < .05$ , \*\* $p < .01$ .

**Figure 8. DAPT inhibition of RIP results in loss of  $\beta adp1$  effects on ECIS-assayed cell adhesion A)**

Multi-well ECIS demonstrating activity of  $\beta adp1$  (red), DAPT (green), and  $\beta adp1 + DAPT$  (blue) compared to vehicle control (black) treated 1610 $\beta 1$  cells. B-D) Quantification of ECIS data at 5-, 20-, and 40-hours post-treatment.  $\beta adp1$  repeats previous results, showing a decrease in resistance at 5 hours, but then steadily increases up to the 40-hour timepoint with no significant difference between control and  $\beta adp1$  resistance at 20 and 40 hours. DAPT does not significantly alter the resistance at any timepoint. However,  $\beta adp1 + DAPT$  decreases resistance compared to DMSO across the entire experiment, suggesting that inhibition of the RIP of  $\beta 1$  disrupts the longer-term gain of adhesion mediated by  $\beta adp1$  beyond 24 hours.

**Figure 9. Model for Effects of SCN1B ( $\beta 1/\beta 1B$ ) immunoglobulin domain mimetic peptides.**

The left panel illustrates the adhesion function and regulated intramembrane proteolysis (RIP) of SCN1B ( $\beta 1$ ). Full length  $\beta 1$  is 37kD and is first cleaved by BACE1. This releases the extracellular domain of  $\beta 1$  containing the Ig domain responsible for cell adhesion, resulting in a 19kD fragment simply called the c-terminal fragment (CTF), which is still located in the membrane and is made up of the transmembrane and intracellular portions of  $\beta 1$ . The CTF is sequentially cleaved by  $\gamma$ -secretase. This results in the intracellular domain (ICD) being released. The ICD is the final cleavage product and translocates to the nucleus, resulting in transcriptional changes. The 4 yellow panels to the right illustrate the effects of the  $\beta adp1/LQLEED$  monomers and the PS2L dimer on adhesion and RIP during acute and sustained treatments.  $\beta adp1/LQLEED$  decrease adhesion and junctional  $I_{Na}$  acutely while increasing RIP over sustained treatment. PS2L increases RIP on an acute level and increases adhesion over the sustained treatment timecourses. Figure created with BioRender.com.

## **SUPPLEMENTAL FIGURE LEGENDS**

**Supplemental Figure 1. Confocal immunolabeling of NRVMs treated with scrambled control peptide for 60 minutes and immunolabeled for  $\beta$ 1 Cx43:** Representative confocal images of NRVMs immunolabeled for Cx43 (red) and  $\beta$ 1 (green) of control NRVMs or after treatment with  $\beta$ adp1 or scrambled  $\beta$ adp1 control peptide at 50  $\mu$ M for 60 minutes. Quantification of scrambled  $\beta$ adp1 control peptide is included in Fig 1. and shows no significant differences in junctional density of SCN1B ( $\beta$ 1/ $\beta$ 1B) compared to control NRVMs.

**Supplemental Figure 2. Effects of  $\beta$ adp1 and short  $\beta$ adp1-based monomeric sequences on relative resistance in 1610 $\beta$ 1 cells  $\beta$ adp1: A and B)** Multi-well ECIS demonstrating activity of  $\beta$ adp1 and short 6-8 amino acid N-terminal truncation variant peptides of  $\beta$ adp1.  $\beta$ adp1 (black) reduces normalized resistance in these cells relative to vehicle control (blue) over 20 hours. Peptides towards the carboxyl terminus of  $\beta$ adp1, especially those incorporating hydrophobic leucine residues, show the most adhesion reducing activity. Based on the ECIS time course data, and predictions from molecular modeling of likely binding in the hydrophobic pocket  $\beta$ 1/SCN1B Ig domain binding surface, the sequence LQLEED was selected as the most effective short peptide candidate drug molecule. n=3 per peptide, \*p<0.05, \*\*p<0.01.

**Supplemental Figure 3.  $\beta$ adp1 control peptide R85D shows no effects on  $\beta$ 1 RIP: A and B)** Western blot analysis demonstrating R85D effects on the 19 kD  $\beta$ 1 CTF generated by RIP. Blot shows effects following treatment with vehicle control (DMEM/F12 culture media with 0.1% DMSO), 1  $\mu$ M DAPT, 50 $\mu$ M R85D, 50 $\mu$ M R85D +1 $\mu$ M DAPT at 6, 24 and 48 hours of treatment. Below the blot in (A) is the total protein control blot. (B) Quantification of the  $\beta$ 1 CTF at 6, 24, and 48 hours normalized to vehicle control, indicating no significant difference in the 19kD fragment when Scr1 treatment is present together with DAPT, relative to DAPT alone at the 6, 24 and 48 hours of a two-day treatment time course. n=3 experimental replicates for each treatment.,



**Table 1.**

| <b>Name</b>      | <b>Molecular Mass</b> | <b>Sequence</b>                      | <b>Design</b>                                                                                 |
|------------------|-----------------------|--------------------------------------|-----------------------------------------------------------------------------------------------|
| SCN1B            | 37 kDa                | ...QKGTEEFVKILRYENEVLQLEEDERFEGRV... |                                                                                               |
| $\beta$ adp1     | 2610.97 Da            | FVKILRYENEVLQLEEDERF                 | Derived directly from SCN1B                                                                   |
| Scr $\beta$ adp1 | 2610.97 Da            | EVEQRDILEFYLLFNVNRKE                 | Scrambled negative control                                                                    |
| Scr1             | 2610.97 Da            | FEELELLKVVNFQRDEIYER                 | Scrambled negative control                                                                    |
| R85D             | 2569.83 Da            | FVKILRYENEVLQLEEDDF                  | Negative control                                                                              |
| LQLEED           | 786.82 Da             | LQLEED                               | Short CT sequence from $\beta$ adp1                                                           |
| PS2L             | 2436.62 Da            | LQLEEDERFGLQLEEDERF                  | Dimerized fragment containing LQLEED repeats                                                  |
| PS2C             | 2642.91 Da            | CLQLEEDERFGLQLEEDERFC                | Dimerized and cyclized fragment with a disulfide bond between cysteine residues on either end |

**Fig 1.**

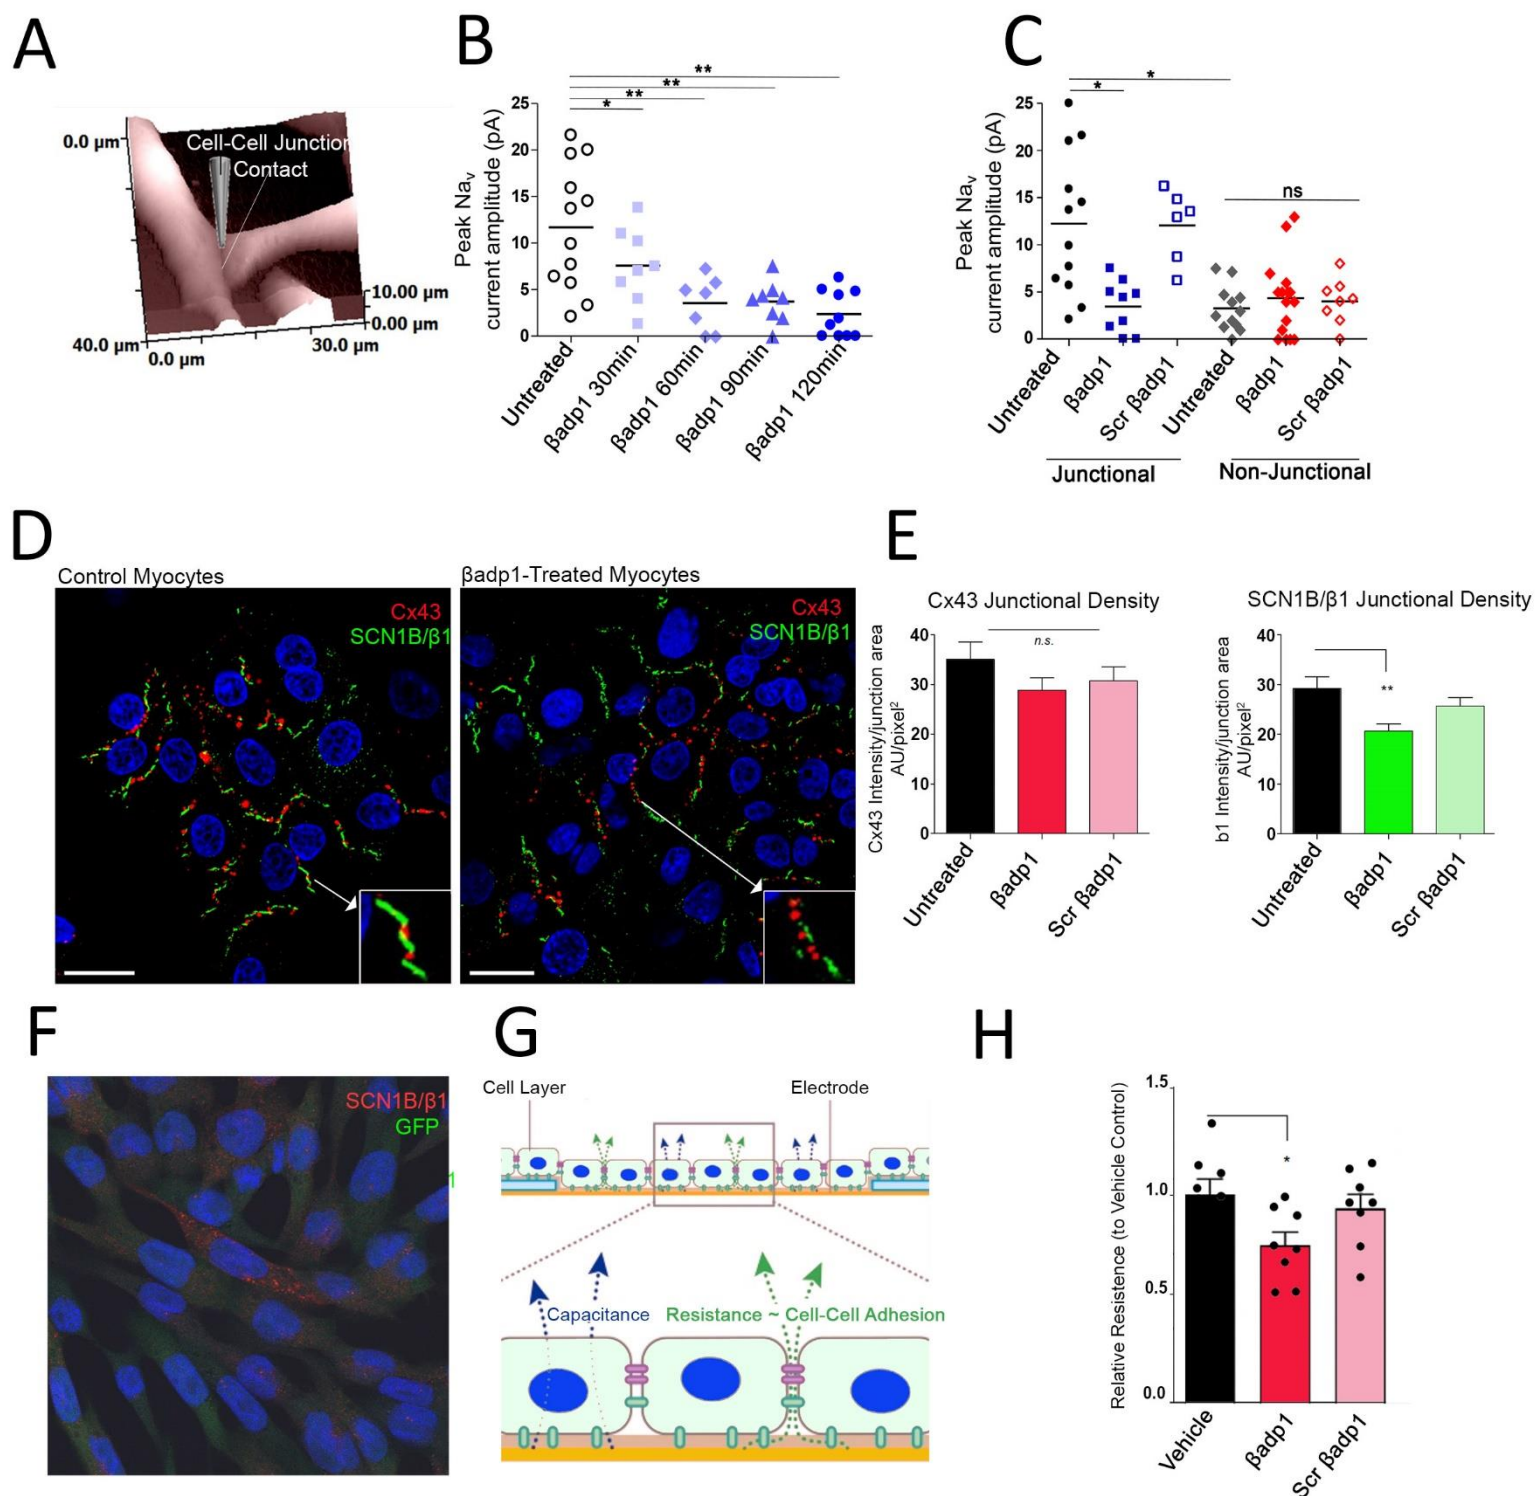

**Fig 2.**

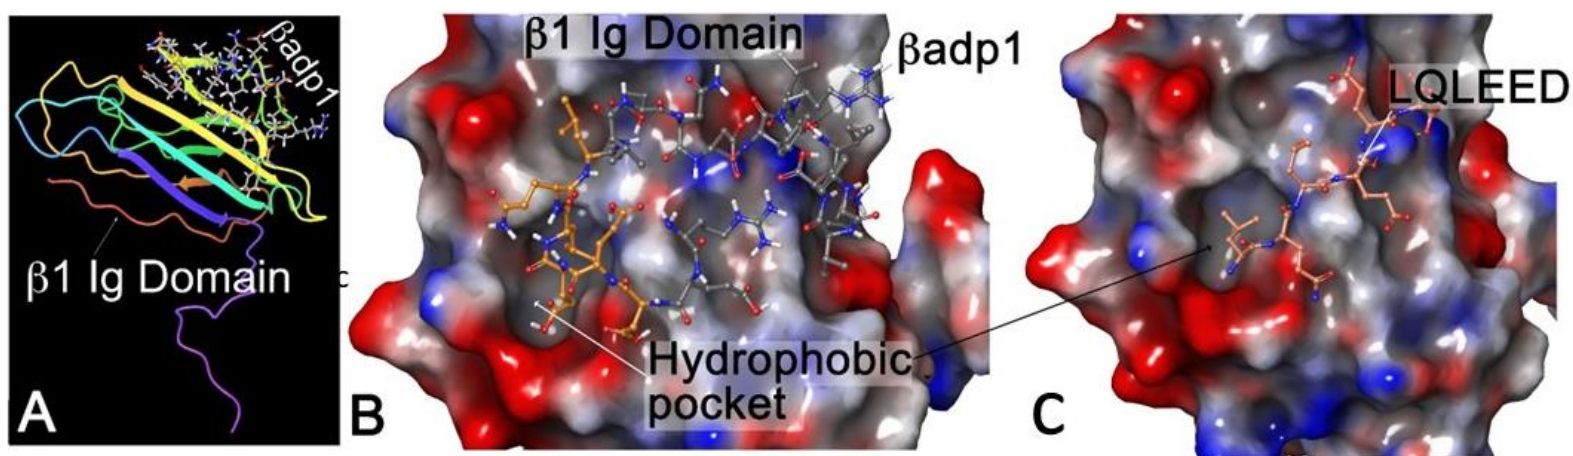

**Fig 3.**

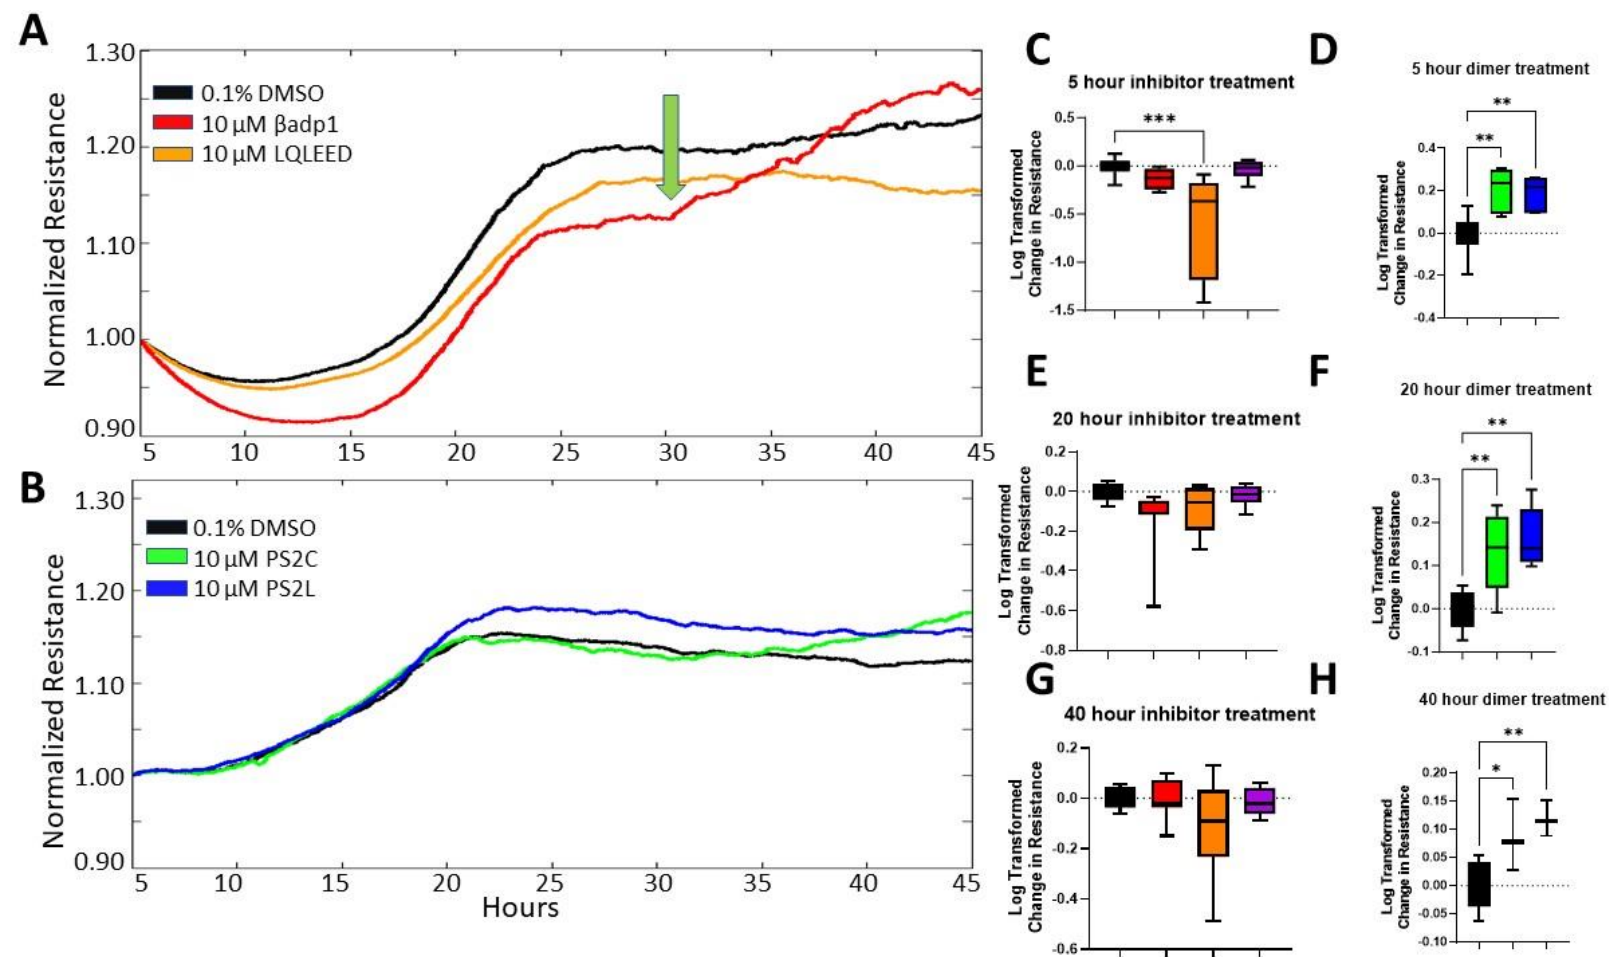

**Fig 4.**

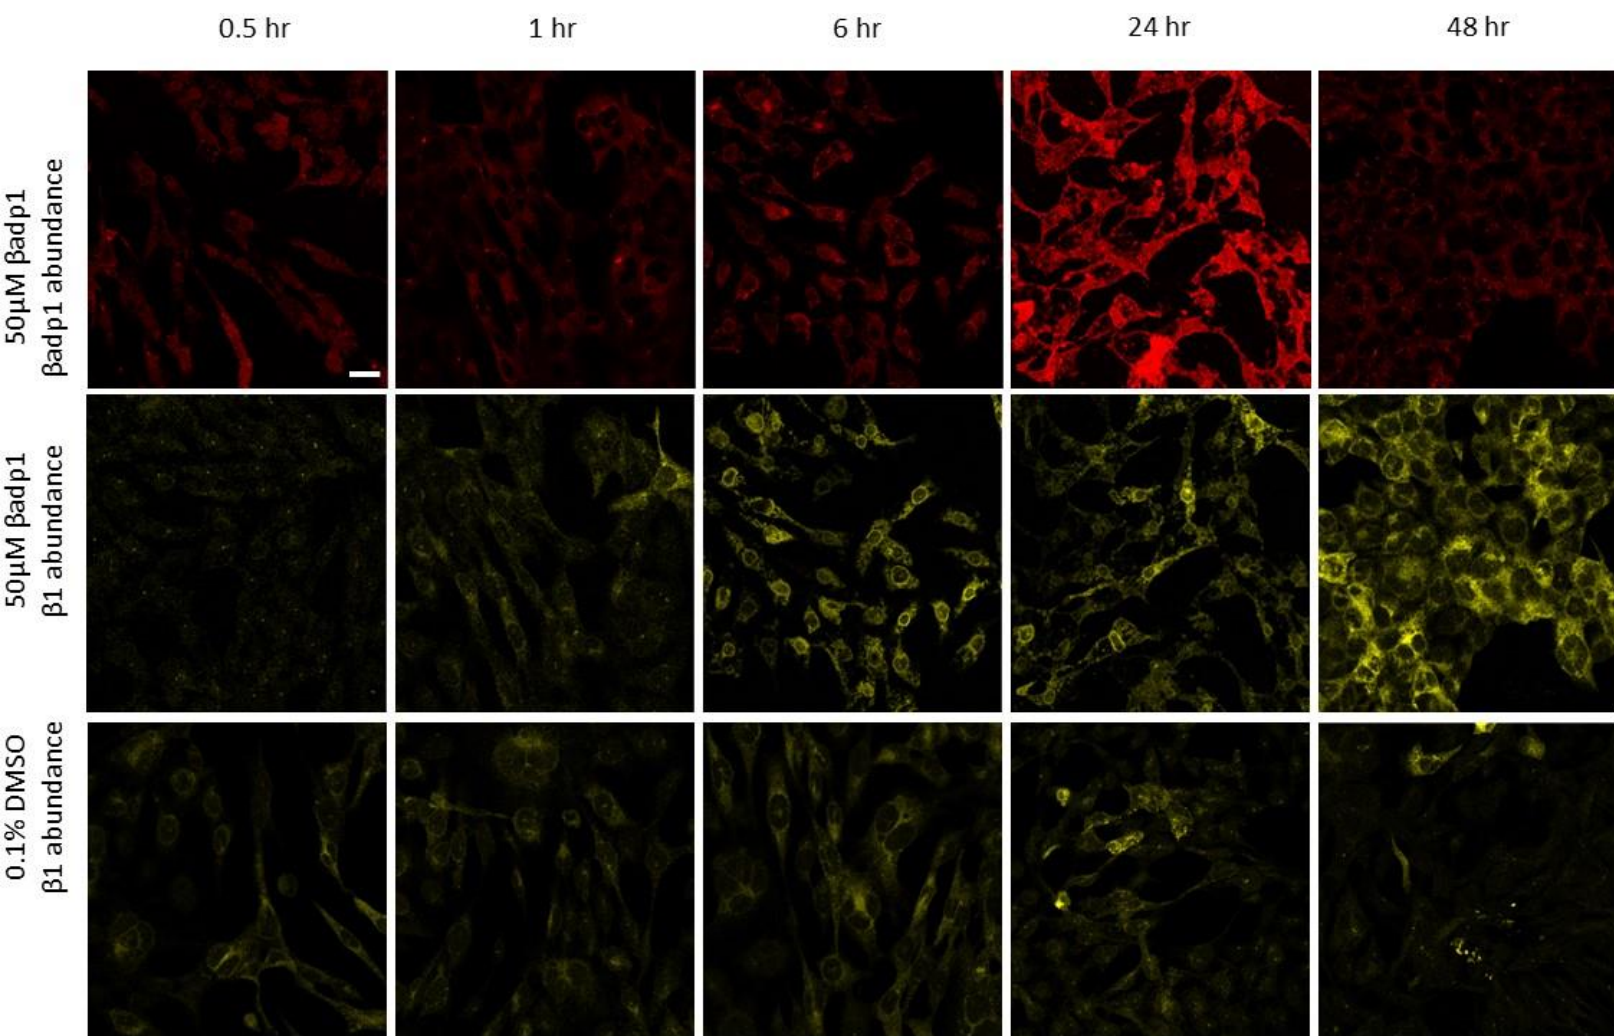

**Fig 5.**

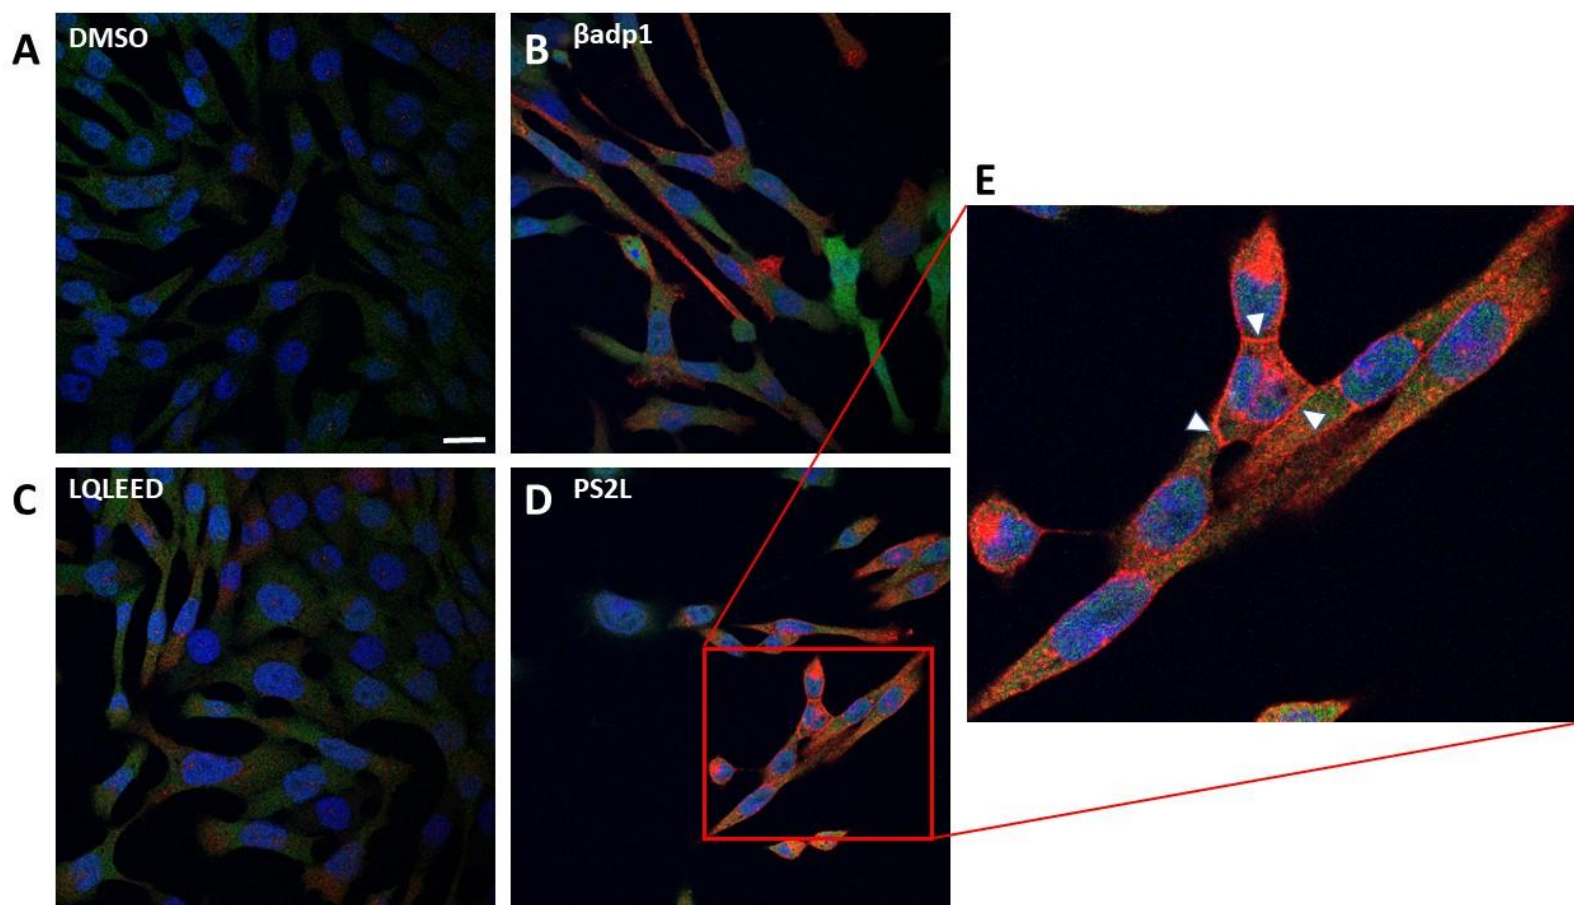

**Fig 6.**

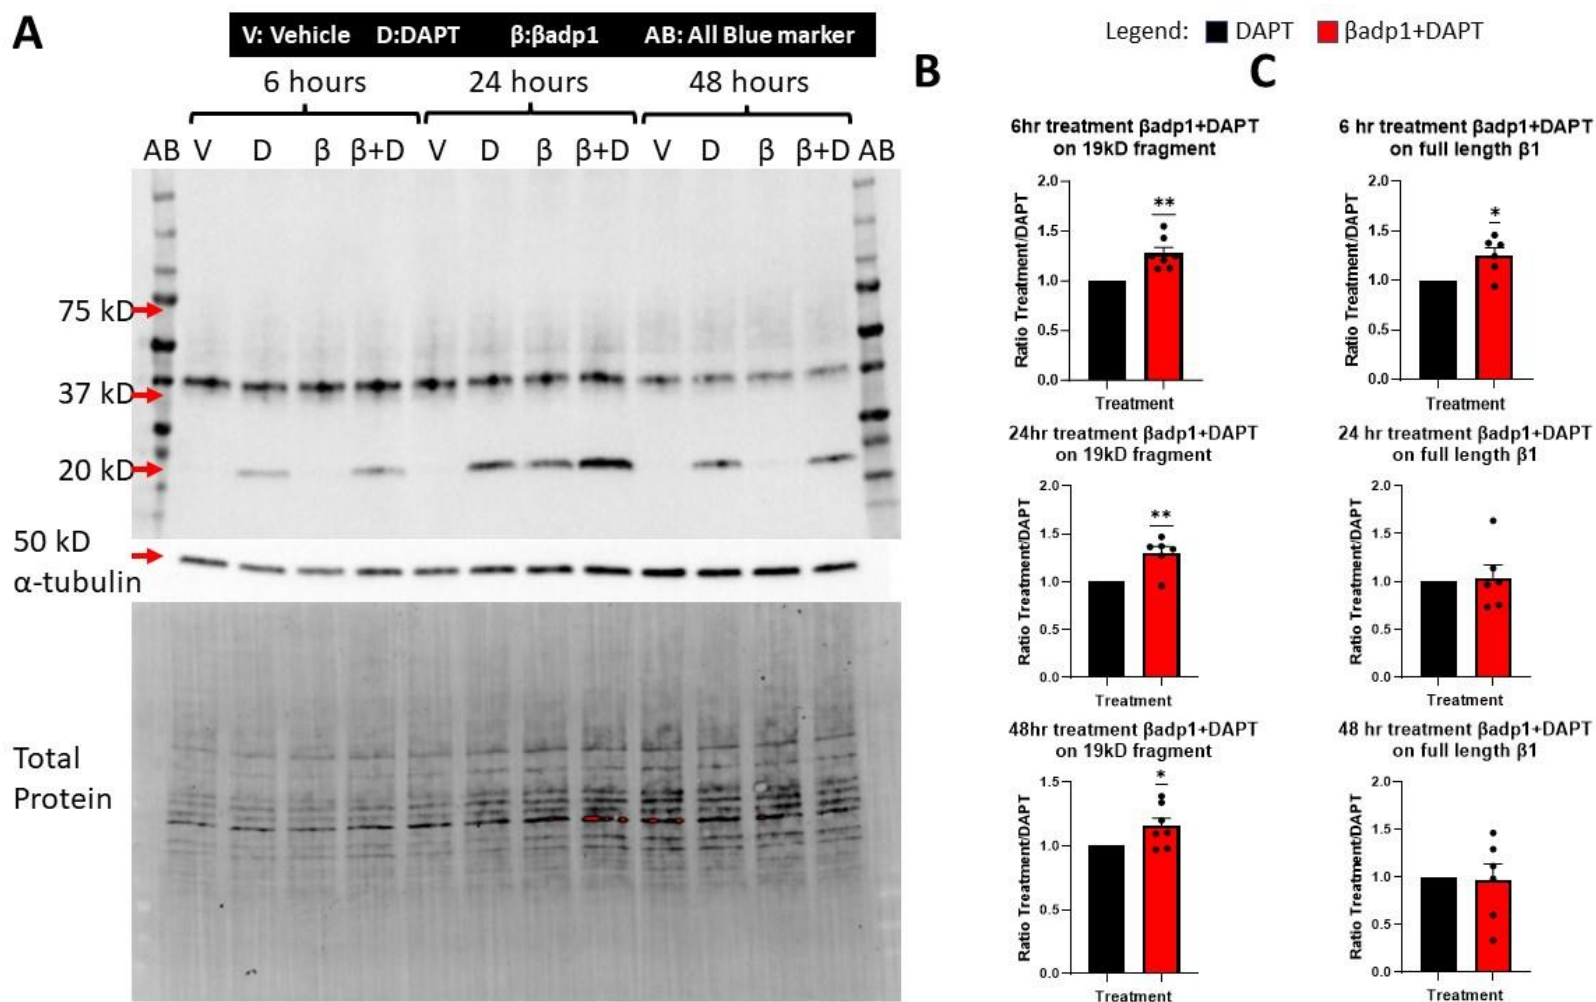

**Fig 7.**

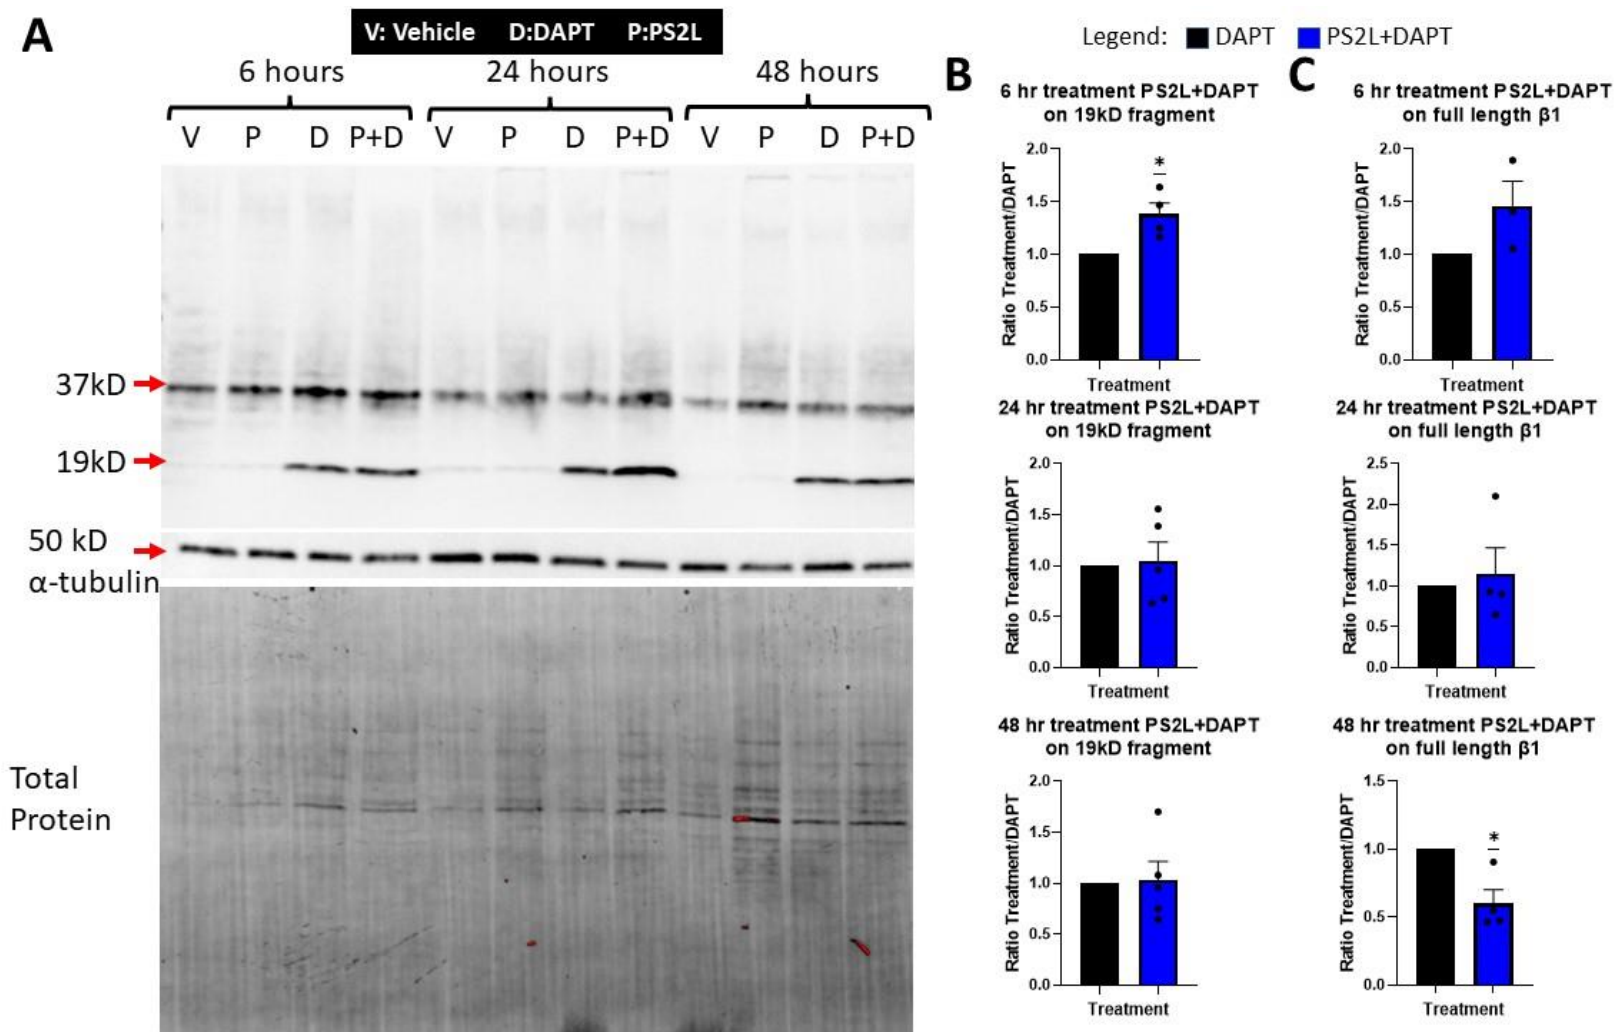



**Fig 8.**

**A**

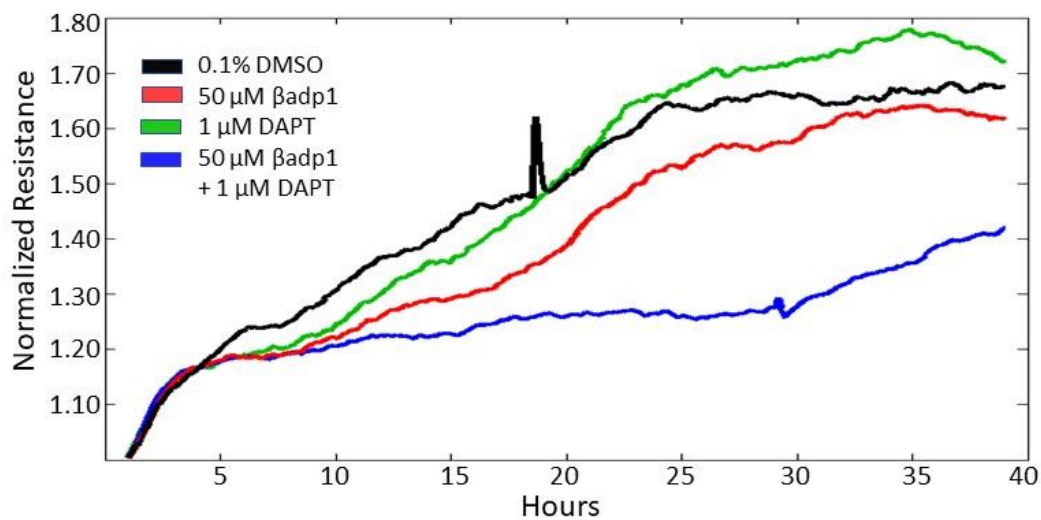

**B**

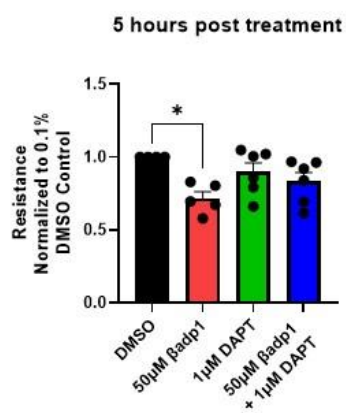

**C**

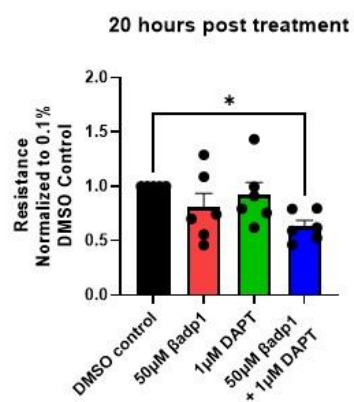

**D**

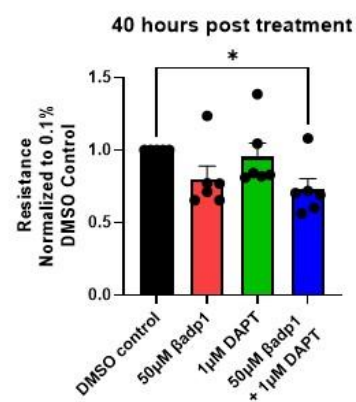

**Fig. 9**

## Effects of SCN1B immunoglobulin domain mimetic peptides

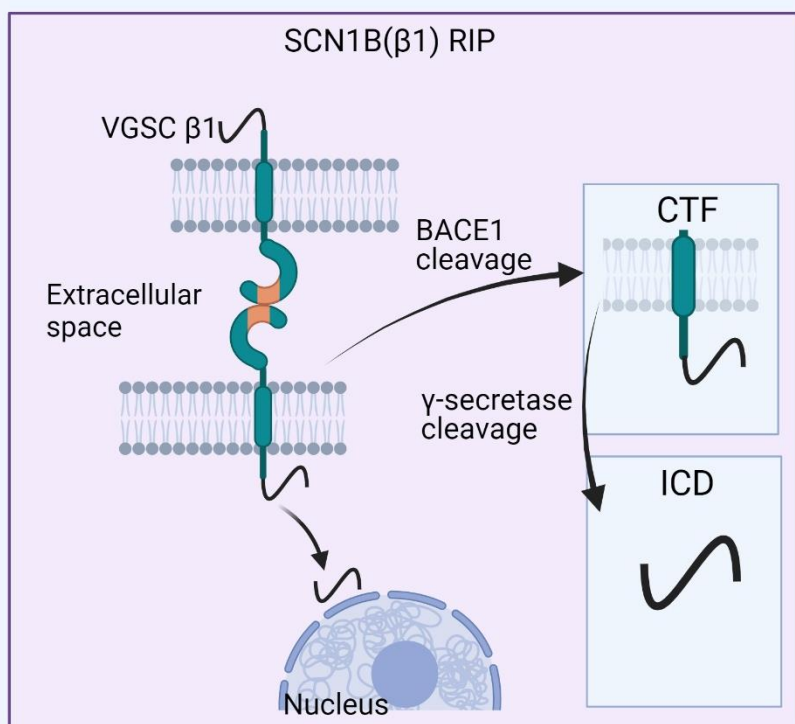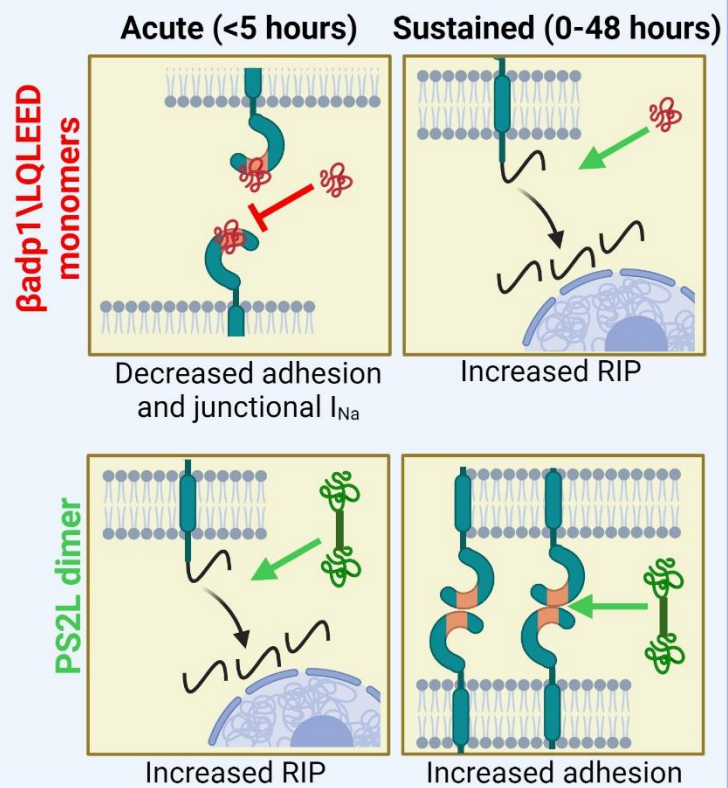

**Supplemental Fig 1.**

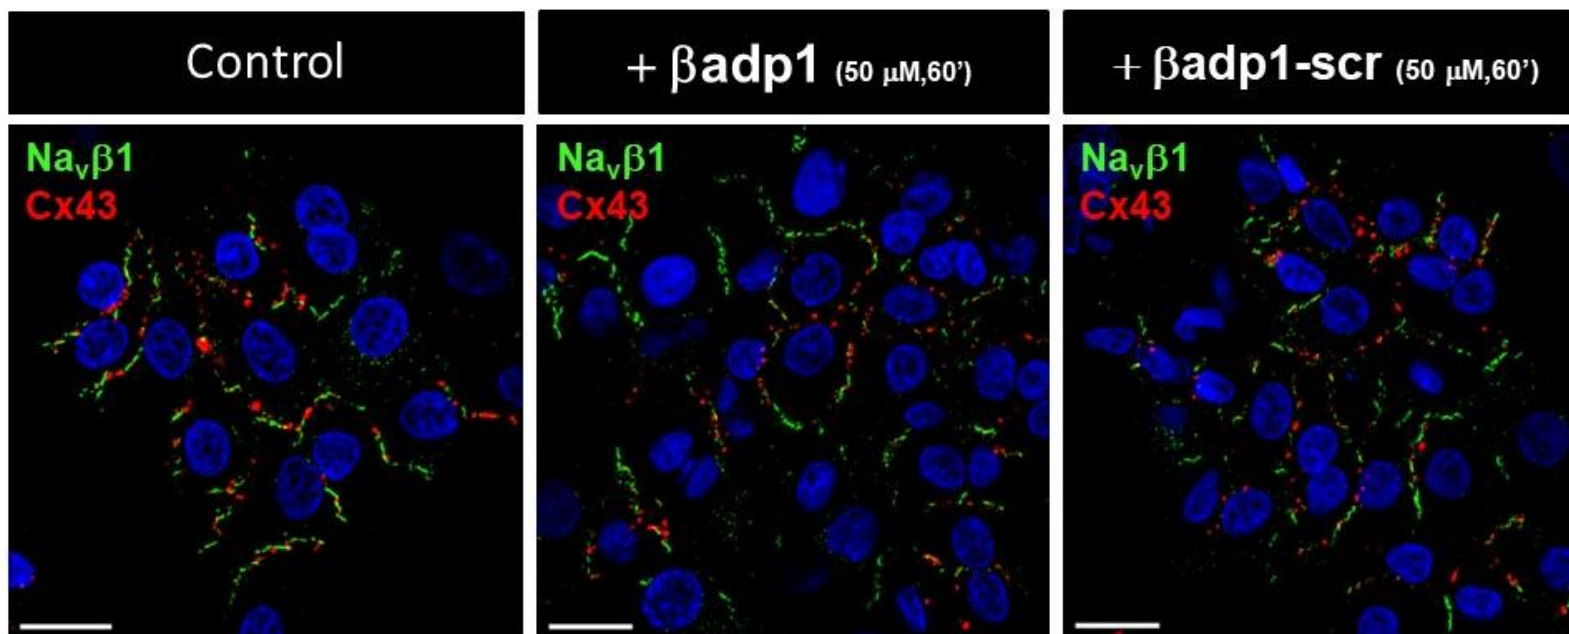

**Supplemental Fig 2.**

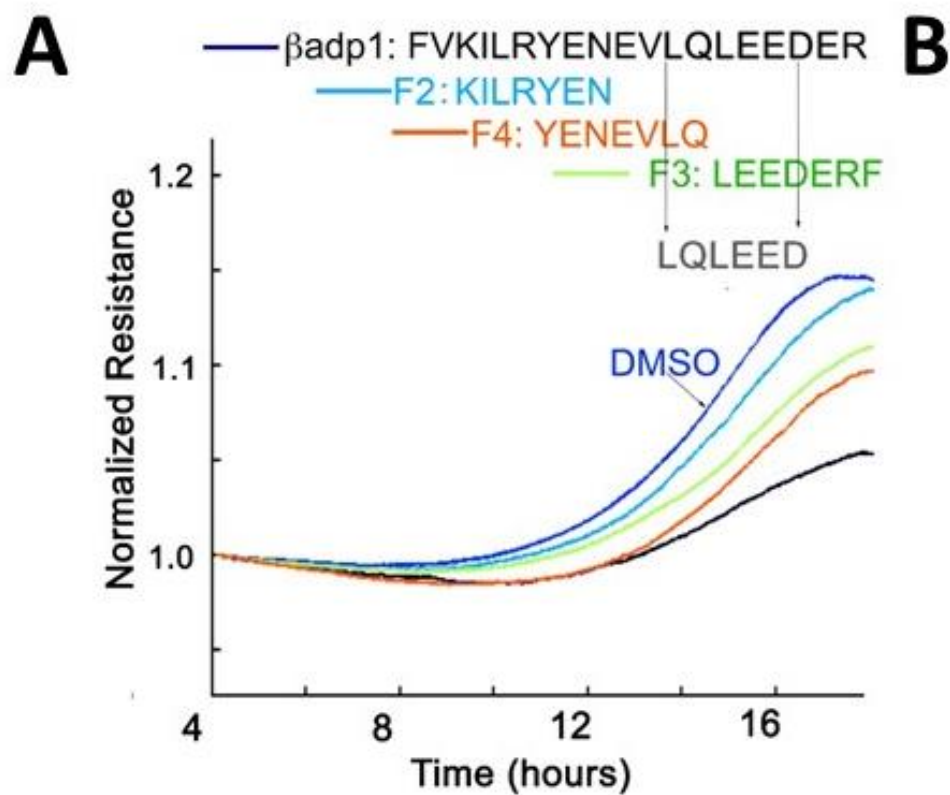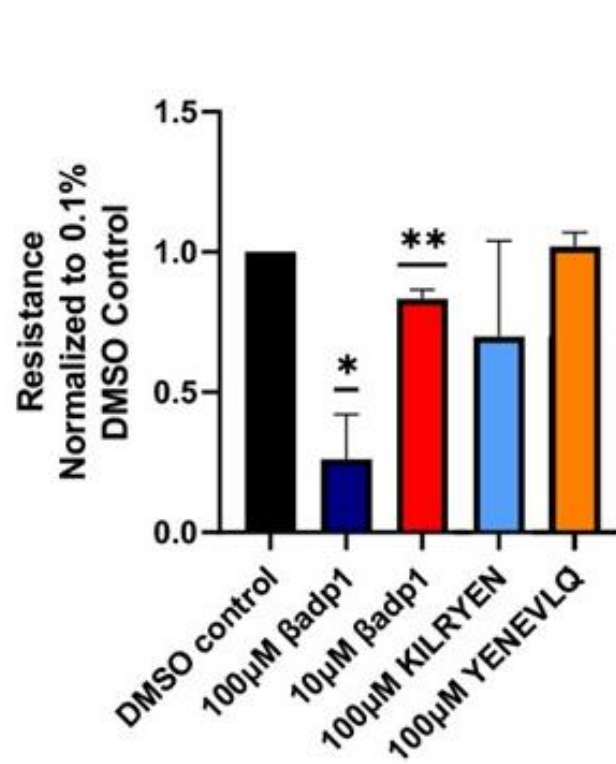

### Supplemental Fig 3.

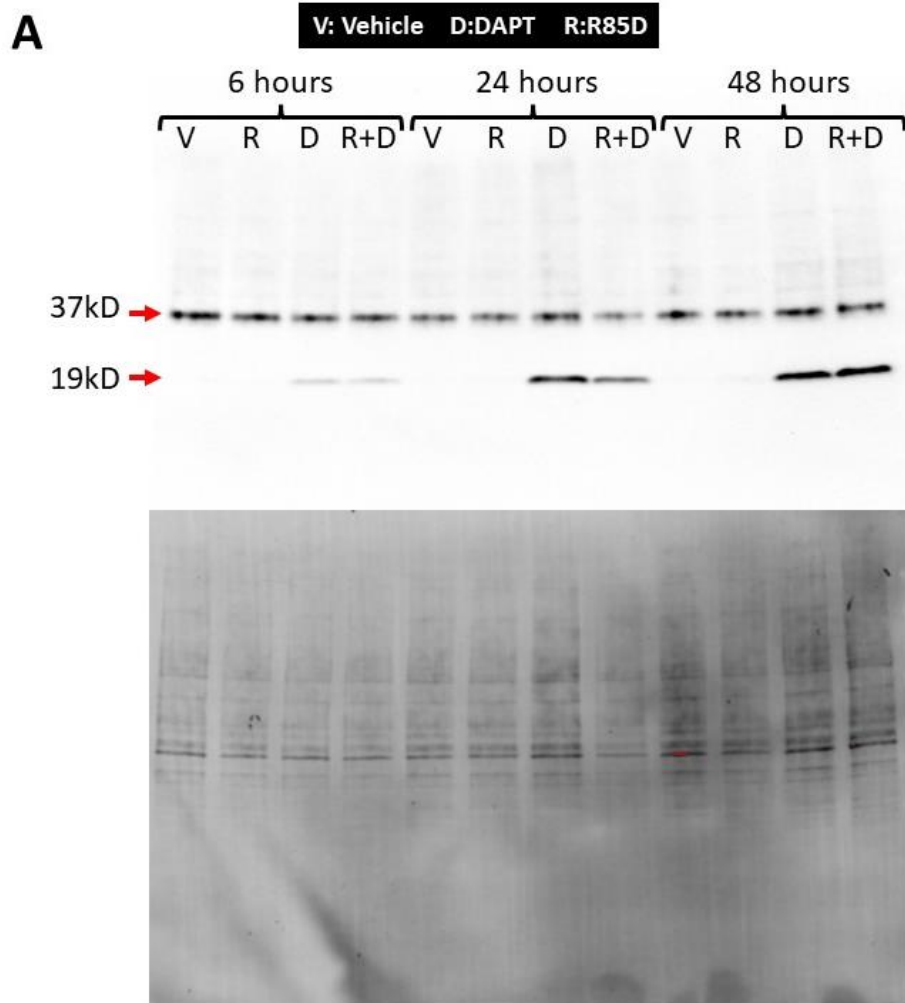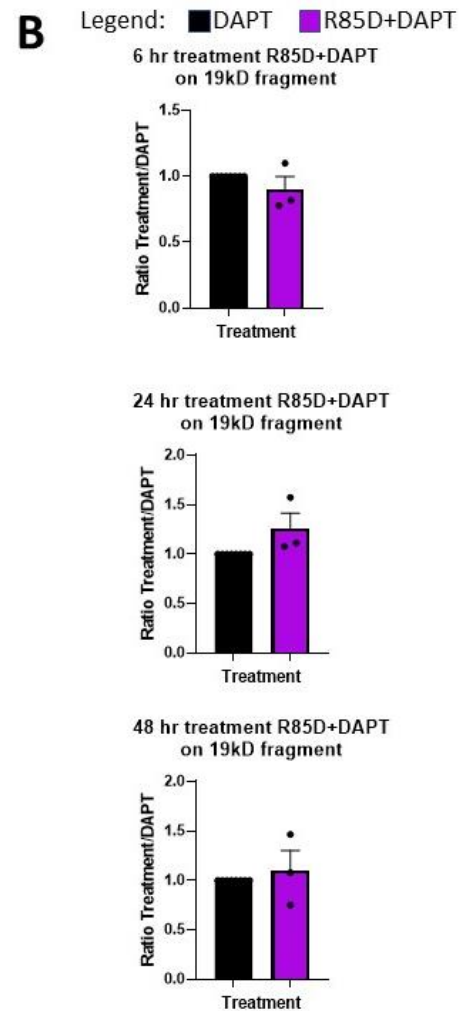

## REFERENCES

1. Deo R, Albert CM. Epidemiology and genetics of sudden cardiac death. *Circulation*. 2012; 125: 620-37.
2. Khurshid S, Choi SH, Weng L-C, Wang EY, Trinquart L, Benjamin EJ, et al. Frequency of Cardiac Rhythm Abnormalities in a Half Million Adults. *Circulation: Arrhythmia and Electrophysiology*. 2018; 11: e006273.
3. Garcia-Elias A, Benito B. Ion Channel Disorders and Sudden Cardiac Death. *Int J Mol Sci*. 2018; 19: 692.
4. Vidhya Rao MPN. Current and Potential Antiarrhythmic Drugs Targeting Voltage-Gated Cardiac Ion Channels. *Cardiovascular Pharmacology: Open Access*. 2015; 04.
5. Echt DS, Liebson PR, Mitchell LB, Peters RW, Obias-Manno D, Barker AH, et al. Mortality and Morbidity in Patients Receiving Encainide, Flecainide, or Placebo. *New England Journal of Medicine*. 1991; 324: 781-8.
6. Effect of the antiarrhythmic agent moricizine on survival after myocardial infarction. *N Engl J Med*. 1992; 327: 227-33.
7. Ajjola OA, Boyle NG, Shivkumar K. Detecting and monitoring arrhythmia recurrence following catheter ablation of atrial fibrillation. *Front Physiol*. 2015; 6: 90.
8. Kim JA, Khan K, Kherallah R, Khan S, Kamat I, Ulhaq O, et al. Innovations in atrial fibrillation ablation. *J Interv Card Electrophysiol*. 2023; 66: 737-56.
9. Hanna P, Buch E, Stavrakis S, Meyer C, Tompkins JD, Ardell JL, et al. Neuroscientific therapies for atrial fibrillation. *Cardiovasc Res*. 2021; 117: 1732-45.
10. Müllenbroich MC, Kelly A, Acker C, Bub G, Bruegmann T, Di Bona A, et al. Novel Optics-Based Approaches for Cardiac Electrophysiology: A Review. *Frontiers in Physiology*. 2021; 12.
11. Moreno JD, Zhu W, Mangold K, Chung W, Silva JR. A Molecularly Detailed Na(V)1.5 Model Reveals a New Class I Antiarrhythmic Target. *JACC Basic Transl Sci*. 2019; 4: 736-51.
12. Nguyen PT, DeMarco KR, Vorobyov I, Clancy CE, Yarov-Yarovoy V. Structural basis for antiarrhythmic drug interactions with the human cardiac sodium channel. *Proc Natl Acad Sci U S A*. 2019; 116: 2945-54.
13. Brackenbury W, Isom L. Na<sup>+</sup> Channel  $\beta$  Subunits: Overachievers of the Ion Channel Family. *Front Pharmacol*. 2011; 2.
14. Patino GA, Brackenbury WJ, Bao Y, Lopez-Santiago LF, O'Malley HA, Chen C, et al. Voltage-gated Na<sup>+</sup> channel  $\beta$ 1B: a secreted cell adhesion molecule involved in human epilepsy. *J Neurosci*. 2011; 31: 14577-91.
15. Beneski DA, Catterall WA. Covalent labeling of protein components of the sodium channel with a photoactivable derivative of scorpion toxin. *Proceedings of the National Academy of Sciences*. 1980; 77: 639-43.
16. Isom LL, De Jongh KS, Catterall WA. Auxiliary subunits of voltage-gated ion channels. *Neuron*. 1994; 12: 1183-94.
17. Isom LL, De Jongh KS, Patton DE, Reber BFX, Offord J, Charbonneau H, et al. Primary Structure and Functional Expression of the  $\beta$ 1 Subunit of the Rat Brain Sodium Channel. *Science*. 1992; 256: 839-42.
18. Isom LL, Ragsdale DS, De Jongh KS, Westenbroek RE, Reber BFX, Scheuer T, et al. Structure and function of the  $\beta$ 2 subunit of brain sodium channels, a transmembrane glycoprotein with a CAM motif. *Cell*. 1995; 83: 433-42.
19. Morgan K, Stevens EB, Shah B, Cox PJ, Dixon AK, Lee K, et al.  $\beta$ 3: An additional auxiliary subunit of the voltage-sensitive sodium channel that modulates channel gating with distinct kinetics. *Proceedings of the National Academy of Sciences*. 2000; 97: 2308-13.

20. Yu FH, Westenbroek RE, Silos-Santiago I, McCormick KA, Lawson D, Ge P, et al. Sodium channel beta4, a new disulfide-linked auxiliary subunit with similarity to beta2. *J Neurosci*. 2003; 23: 7577-85.
21. Veeraghavan R, Hoeker GS, Alvarez-Laviada A, Hoagland D, Wan X, King DR, et al. The adhesion function of the sodium channel beta subunit ( $\beta$ 1) contributes to cardiac action potential propagation. *Elife*. 2018; 7: e37610.
22. Rhett JM, Ongstad EL, Jourdan J, Gourdie RG. Cx43 associates with Na(v)1.5 in the cardiomyocyte perinexus. *J Membr Biol*. 2012; 245: 411-22.
23. Deschênes I, Armoundas AA, Jones SP, Tomaselli GF. Post-transcriptional gene silencing of KCHIP2 and Navbeta1 in neonatal rat cardiac myocytes reveals a functional association between Na and Ito currents. *J Mol Cell Cardiol*. 2008; 45: 336-46.
24. Teng ACT, Gu L, Di Paola M, Lakin R, Williams ZJ, Au A, et al. Tmem65 is critical for the structure and function of the intercalated discs in mouse hearts. *Nature Communications*. 2022; 13: 6166.
25. Malhotra JD, Kazen-Gillespie K, Hortsch M, Isom LL. Sodium Channel  $\beta$  Subunits Mediate Homophilic Cell Adhesion and Recruit Ankyrin to Points of Cell-Cell Contact\*. *Journal of Biological Chemistry*. 2000; 275: 11383-8.
26. Ivanovic E, Kucera JP. Localization of Na(+) channel clusters in narrowed perinexi of gap junctions enhances cardiac impulse transmission via ephaptic coupling: a model study. *J Physiol*. 2021; 599: 4779-811.
27. Adams WP, Raisch TB, Zhao Y, Davalos R, Barrett S, King DR, et al. Extracellular Perinexal Separation Is a Principal Determinant of Cardiac Conduction. *Circ Res*. 2023; 133: 658-73.
28. Lin J, Abraham A, George SA, Greer-Short A, Blair GA, Moreno A, et al. Ephaptic Coupling Is a Mechanism of Conduction Reserve During Reduced Gap Junction Coupling. *Frontiers in Physiology*. 2022; 13.
29. Hoeker GS, James CC, Tegge AN, Gourdie RG, Smyth JW, Poelzing S. Attenuating loss of cardiac conduction during no-flow ischemia through changes in perfusate sodium and calcium. *American Journal of Physiology-Heart and Circulatory Physiology*. 2020; 319: H396-H409.
30. Veeraghavan R, Lin J, Keener JP, Gourdie R, Poelzing S. Potassium channels in the Cx43 gap junction perinexus modulate ephaptic coupling: an experimental and modeling study. *Pflugers Arch*. 2016; 468: 1651-61.
31. Moise N, Struckman HL, Dagher C, Veeraghavan R, Weinberg SH. Intercalated disk nanoscale structure regulates cardiac conduction. *Journal of General Physiology*. 2021; 153.
32. Mezache L, Struckman HL, Greer-Short A, Baine S, Györke S, Radwański PB, et al. Vascular endothelial growth factor promotes atrial arrhythmias by inducing acute intercalated disk remodeling. *Sci Rep*. 2020; 10: 20463.
33. Raisch TB, Yanoff MS, Larsen TR, Farooqui MA, King DR, Veeraghavan R, et al. Intercalated Disk Extracellular Nanodomain Expansion in Patients With Atrial Fibrillation. *Front Physiol*. 2018; 9: 398.
34. Watanabe H, Darbar D, Kaiser DW, Jiramongkolchai K, Chopra S, Donahue BS, et al. Mutations in sodium channel  $\beta$ 1- and  $\beta$ 2-subunits associated with atrial fibrillation. *Circ Arrhythm Electrophysiol*. 2009; 2: 268-75.
35. Watanabe H, Koopmann TT, Le Scouarnec S, Yang T, Ingram CR, Schott JJ, et al. Sodium channel  $\beta$ 1 subunit mutations associated with Brugada syndrome and cardiac conduction disease in humans. *J Clin Invest*. 2008; 118: 2260-8.
36. Wong H-K, Sakurai T, Oyama F, Kaneko K, Wada K, Miyazaki H, et al.  $\beta$  Subunits of Voltage-gated Sodium Channels Are Novel Substrates of  $\beta$ -Site Amyloid Precursor Protein-cleaving Enzyme (BACE1) and  $\gamma$ -Secretase\*. *Journal of Biological Chemistry*. 2005; 280: 23009-17.
37. Bouza AA, Philippe JM, Edokobi N, Pinsky AM, Offord J, Calhoun JD, et al. Sodium channel  $\beta$ 1 subunits are post-translationally modified by tyrosine phosphorylation, S-palmitoylation, and regulated intramembrane proteolysis. *J Biol Chem*. 2020; 295: 10380-93.
38. Bouza AA, Edokobi N, Hodges SL, Pinsky AM, Offord J, Piao L, et al. Sodium channel  $\beta$ 1 subunits participate in regulated intramembrane proteolysis-excitation coupling. *JCI Insight*. 2021; 6.

39. Hoagland DT, Santos W, Poelzing S, Gourdie RG. The role of the gap junction perinexus in cardiac conduction: Potential as a novel anti-arrhythmic drug target. *Prog Biophys Mol Biol.* 2019; 144: 41-50.
40. Salvage SC, Huang CL, Jackson AP. Cell-Adhesion Properties of  $\beta$ -Subunits in the Regulation of Cardiomyocyte Sodium Channels. *Biomolecules.* 2020; 10.
41. Williams G, Williams EJ, Doherty P. Dimeric versions of two short N-cadherin binding motifs (HAVDI and INPISG) function as N-cadherin agonists. *J Biol Chem.* 2002; 277: 4361-7.
42. Schlipp A, Schinner C, Spindler V, Vielmuth F, Gehmlich K, Syrris P, et al. Desmoglein-2 interaction is crucial for cardiomyocyte cohesion and function. *Cardiovasc Res.* 2014; 104: 245-57.
43. Scheffer IE, Harkin LA, Grinton BE, Dibbens LM, Turner SJ, Zielinski MA, et al. Temporal lobe epilepsy and GEFS+ phenotypes associated with SCN1B mutations. *Brain.* 2007; 130: 100-9.
44. Kazen-Gillespie KA, Ragsdale DS, D'Andrea MR, Mattei LN, Rogers KE, Isom LL. Cloning, localization, and functional expression of sodium channel beta1A subunits. *J Biol Chem.* 2000; 275: 1079-88.
45. Qin N, D'Andrea MR, Lubin ML, Shafaei N, Codd EE, Correa AM. Molecular cloning and functional expression of the human sodium channel beta1B subunit, a novel splicing variant of the beta1 subunit. *Eur J Biochem.* 2003; 270: 4762-70.
46. Baroni D, Moran O. On the multiple roles of the voltage gated sodium channel  $\beta$ 1 subunit in genetic diseases. *Front Pharmacol.* 2015; 6: 108-.
47. Giudicessi JR, Ackerman MJ. Determinants of incomplete penetrance and variable expressivity in heritable cardiac arrhythmia syndromes. *Transl Res.* 2013; 161: 1-14.
48. Wallace RH, Scheffer IE, Parasivam G, Barnett S, Wallace GB, Sutherland GR, et al. Generalized epilepsy with febrile seizures plus: mutation of the sodium channel subunit SCN1B. *Neurology.* 2002; 58: 1426-9.
49. Wallace RH, Wang DW, Singh R, Scheffer IE, George AL, Jr., Phillips HA, et al. Febrile seizures and generalized epilepsy associated with a mutation in the Na<sup>+</sup>-channel beta1 subunit gene SCN1B. *Nat Genet.* 1998; 19: 366-70.
50. Patino GA, Claes LR, Lopez-Santiago LF, Slat EA, Dondeti RS, Chen C, et al. A functional null mutation of SCN1B in a patient with Dravet syndrome. *J Neurosci.* 2009; 29: 10764-78.
51. Ogiwara I, Nakayama T, Yamagata T, Ohtani H, Mazaki E, Tsuchiya S, et al. A homozygous mutation of voltage-gated sodium channel  $\beta$ (I) gene SCN1B in a patient with Dravet syndrome. *Epilepsia.* 2012; 53: e200-3.
52. Martinez-Moreno R, Selga E, Riuró H, Carreras D, Parnes M, Srinivasan C, et al. An SCN1B Variant Affects Both Cardiac-Type (NaV1.5) and Brain-Type (NaV1.1) Sodium Currents and Contributes to Complex Concomitant Brain and Cardiac Disorders. *Frontiers in Cell and Developmental Biology.* 2020; 8.
53. Angsutararux P, Zhu W, Voelker TL, Silva JR. Molecular Pathology of Sodium Channel Beta-Subunit Variants. *Front Pharmacol.* 2021; 12: 761275.
54. Haworth AS, Hodges SL, Capatina AL, Isom LL, Baumann CG, Brackenbury WJ. Subcellular dynamics and functional activity of the cleaved intracellular domain of the Na<sup>+</sup> channel  $\beta$ 1 subunit. *Journal of Biological Chemistry.* 2022: 102174.
55. Liu Y-C, Hsu W-L, Ma Y-L, Lee EHY. Melatonin Induction of APP Intracellular Domain 50 SUMOylation Alleviates AD through Enhanced Transcriptional Activation and A $\beta$  Degradation. *Molecular Therapy.* 2021; 29: 376-95.
56. Shu R, Wong W, Ma QH, Yang ZZ, Zhu H, Liu FJ, et al. APP intracellular domain acts as a transcriptional regulator of miR-663 suppressing neuronal differentiation. *Cell Death & Disease.* 2015; 6: e1651-e.
57. van Tetering G, Vooijs M. Proteolytic cleavage of Notch: "HIT and RUN". *Curr Mol Med.* 2011; 11: 255-69.
58. Hodges SL, Bouza AA, Isom LL. Therapeutic Potential of Targeting Regulated Intramembrane Proteolysis Mechanisms of Voltage-Gated Ion Channel Subunits and Cell Adhesion Molecules. *Pharmacol Rev.* 2022; 74: 1028-48.



59. O'Malley HA, Isom LL. Sodium channel  $\beta$  subunits: emerging targets in channelopathies. *Annu Rev Physiol.* 2015; 77: 481-504.
60. Chen C, Westenbroek RE, Xu X, Edwards CA, Sorenson DR, Chen Y, et al. Mice Lacking Sodium Channel  $\beta$ 1 Subunits Display Defects in Neuronal Excitability, Sodium Channel Expression, and Nodal Architecture. *The Journal of Neuroscience.* 2004; 24: 4030-42.
61. Dulsat G, Palomeras S, Cortada E, Riuró H, Brugada R, Vergés M. Trafficking and localisation to the plasma membrane of Na(v) 1.5 promoted by the  $\beta$ 2 subunit is defective due to a  $\beta$ 2 mutation associated with Brugada syndrome. *Biol Cell.* 2017; 109: 273-91.
62. Marsh SR, Pridham KJ, Jourdan J, Gourdie RG. Novel Protocols for Scalable Production of High Quality Purified Small Extracellular Vesicles from Bovine Milk. *Nanotheranostics.* 2021; 5: 488-98.
63. Munagala R, Aqil F, Jeyabalan J, Gupta RC. Bovine milk-derived exosomes for drug delivery. *Cancer Lett.* 2016; 371: 48-61.
64. Pieters BCH, Arntz OJ, Aarts J, Feitsma AL, van Neerven RJJ, van der Kraan PM, et al. Bovine Milk-Derived Extracellular Vesicles Inhibit Catabolic and Inflammatory Processes in Cartilage from Osteoarthritis Patients. *Mol Nutr Food Res.* 2022; 66: e2100764.
65. Isom LL, Scheuer T, Brownstein AB, Ragsdale DS, Murphy BJ, Catterall WA. Functional co-expression of the beta 1 and type IIA alpha subunits of sodium channels in a mammalian cell line. *J Biol Chem.* 1995; 270: 3306-12.
